# Supplementary material for: Interpretable genotype-to-phenotype classifiers with performance guarantees
Source: bioRxiv or medRxiv preprint supplement (doi:10.1101/388348), 2019-03-07
Supplement: Supplementary file [file 388348-1.pdf]

# Interpretable genotype-to-phenotype classifiers with performance guarantees

## Supplementary information

Alexandre Drouin<sup>1,2,\*</sup>, Gaël Letarte<sup>1,2</sup>, Frédéric Raymond<sup>3,4</sup>, Mario Marchand<sup>1,2</sup>, Jacques Corbeil<sup>2,5</sup>, and François Laviolette<sup>1,2</sup>

<sup>1</sup>Department of Computer Science and Software Engineering, Université Laval, Quebec, Canada

<sup>2</sup>Big Data Research Centre, Université Laval, Quebec, Canada

<sup>3</sup>School of nutrition, Université Laval, Quebec, Canada

<sup>4</sup>Institute of Nutrition and Functional Foods, Université Laval, Quebec, Canada

<sup>5</sup>Infectious Disease Research Centre, Université Laval, Quebec, Canada

\*alexandre.drouin.8@ulaval.ca

## Supplementary methods

### A sample compression risk bound for decision trees

Based on the pioneering work of Littlestone and Warmuth (1986)<sup>1</sup> and Floyd and Warmuth (1995)<sup>2</sup>, Marchand and Sokolova (2005)<sup>3</sup> obtained a general sample compression bound that can be used to upper bound the generalization error (see Equation (1) of main text) of any classifier  $h$ , such that  $h = \mathbf{R}(Z, \sigma)$ , where  $\mathbf{R}$  is a reconstruction function that unambiguously reconstructs  $h$  using a small subset  $Z$  of the training examples (referred to as the *compression set*) and a message  $\sigma$  of additional information. Their bound is as follows: for any data-generating distribution  $D$ , any compression set  $Z$  and message  $\sigma$ , we have that, with probability at least  $1 - \delta$  (over the random draws of  $S$  according to  $D^m$ ),  $R(h) \leq \varepsilon(h, S, \delta)$ , with

$$\varepsilon(h, S, \delta) = 1 - \exp\left(\frac{-1}{m - |Z| - r} \left[ \ln\binom{m}{|Z|} + \ln\binom{m - |Z|}{r} + \ln\left(\frac{1}{P_Z(\sigma)}\right) + \ln\left(\frac{1}{\xi(|Z|)\xi(r)\delta}\right) \right]\right), \quad (\text{S1})$$

where  $Z \subseteq S$ ,  $P_Z(\sigma)$  is the prior probability assigned to the message  $\sigma$  given that the compression set is  $Z$ ,  $|Z|$  denotes the number of examples in the compression set  $Z$ ,  $r$  is the number of prediction errors made by  $h$  on  $S \setminus Z$ , and

$$\xi(a) \stackrel{\text{def}}{=} \frac{6}{\pi^2} (a+1)^{-2}. \quad (\text{S2})$$

In order to use this result to obtain a sample compression bound for  $k$ -mer-based decision tree models used in this study, we must design a message  $\sigma$ , and a corresponding compression set  $Z$ , that jointly allow to unambiguously reconstruct any decision tree classifier  $h$ . Recall from the main text that  $Z$  contains the genomes selected such that every  $k$ -mer in the model appears at least once in  $Z$ . Recall also that  $N(Z)$  denotes the number of nucleotides contained in  $Z$ .

Our approach relies on the fact that any tree with  $n$  inner nodes admits a unique preorder enumeration of its  $2n + 1$  nodes ( $n$  inner nodes and  $n + 1$  leaves). We also consider that each message  $\sigma$  is given by a tuple  $(n, \mathbf{v}_1, \mathbf{v}_2, \mathbf{v}_3)$ , where

- $\mathbf{v}_1 \in \{0, 1\}^{2n+1}$  is a vector that gives the type of each node in the enumeration, such that  $v_{1_i} \stackrel{\text{def}}{=} 1$  if the  $i^{\text{th}}$  node is an inner node and  $v_{1_i} \stackrel{\text{def}}{=} 0$  otherwise.
- $\mathbf{v}_2 \in \{1, \dots, c\}^{n+1}$  is a vector indicating the class predicted by each leaf in the enumeration;  $c$  is the number of classes.
- $\mathbf{v}_3 \in \{1, \dots, N(Z)\}^n$  is a vector that specifies the  $k$ -mer used by each inner node (rule) in the enumeration, based on its position in the concatenated sequence of all genomes in  $Z$ .

Any decision tree  $h$  can then be straightforwardly reconstructed from any compression set  $Z$  and any such message tuple.

To obtain a generalization error bound, we must also define a prior probability distribution  $P_Z(\sigma)$  over all possible values of  $\sigma$ , given a compression set  $Z$ . We start by attributing a probability of  $\xi(n)$  to the number of inner nodes. Thus,

$$P_Z(\sigma) = P_Z(\sigma|n) \cdot \xi(n), \quad (\text{S3})$$

which reflects our prior belief that smaller trees are more likely than large ones. We then assign equal probability to all messages specifying trees of  $n$  inner nodes:

$$P_Z(\sigma|n) = P_1(\mathbf{v}_1) \cdot P_2(\mathbf{v}_2) \cdot P_3(\mathbf{v}_3), \quad (\text{S4})$$

where  $P_1$ ,  $P_2$ , and  $P_3$  are chosen as follows. First,

$$P_1(\mathbf{v}_1) = \frac{1}{\binom{2n+1}{n}}, \quad (\text{S5})$$

which assigns equal probability to all vectors  $\mathbf{v}_1$  with  $n$  elements equal to 1 and  $n+1$  elements equal to 0. Then

$$P_2(\mathbf{v}_2) = \left(\frac{1}{c}\right)^{n+1}, \quad (\text{S6})$$

which assigns equal probability to each class for the  $n+1$  leaves. Finally,

$$P_3(\mathbf{v}_3) = \left(\frac{1}{N(Z)}\right)^n, \quad (\text{S7})$$

which assigns equal probability over all positions in the combined sequence of all genomes in  $Z$  for every inner node. Hence, we obtain a prior  $P_Z(\sigma)$ , where

$$P_Z(\sigma) = \frac{6}{\pi^2} (n+1)^{-2} \binom{2n+1}{n}^{-1} \left(\frac{1}{N(Z)}\right)^n \left(\frac{1}{c}\right)^{n+1}. \quad (\text{S8})$$

By inserting this prior  $P_Z(\sigma)$  into Equation S1, we obtain a sample compression risk bound  $\varepsilon_{\text{CART}}(h, S, \delta)$ , which valid for any decision tree  $h$  based on rules that detect the presence of  $k$ -mers:

$$\varepsilon_{\text{CART}}(h, S, \delta) = 1 - \exp\left(\frac{-1}{m - |Z| - r} \left[ \ln \binom{m}{|Z|} + \ln \binom{m - |Z|}{r} + \ln \binom{2n+1}{n} + n \cdot \ln(N(Z)) + (n+1) \ln(c) + \ln \left( \frac{\pi^6 (n+1)^2 (r+1)^2 (|Z|+1)^2}{216 \cdot \delta} \right) \right]\right). \quad (\text{S9})$$

In the main text, we use  $|h|$ , instead of  $n$ , for the number of rules (i.e., internal nodes) in the decision tree  $h$ .

## Supplementary figures

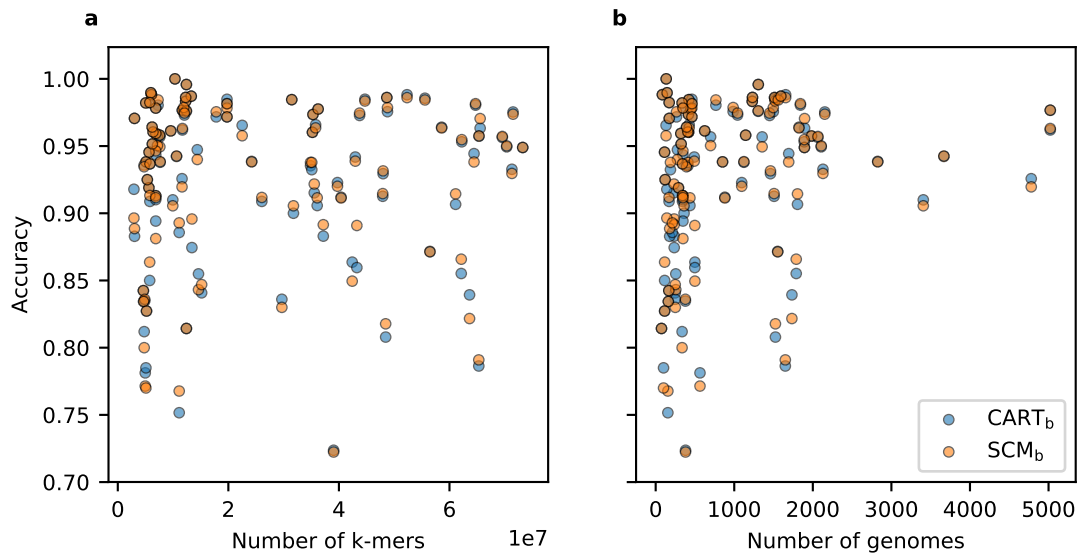

**Figure S1.** Accuracy of the  $CART_b$  and  $SCM_b$  models with respect to a) the number of  $k$ -mers and b) the number of genomes in each of the 107 dataset (shown as dots). Clearly, small numbers of genomes are not associated with poor accuracies. The same is true for large numbers of  $k$ -mers. These results emphasize the ability of these algorithms to achieve good generalization despite small samples sizes and extremely high dimensional data.

## Supplementary tables

**Table S1.** Detailed results for all datasets and methods. For each dataset (species-antibiotic pair), the number of genomes and  $k$ -mers is shown, along with the accuracy, sensitivity, specificity, F1 score, and the complexity of the models learned by each algorithm (average  $\pm$  standard deviation for ten repetitions – see main text). The complexity is the number of  $k$ -mers used by the models, with all\* indicating that feature selection was performed (see main text) and that the one million selected features were used. Missing F1 score values indicate that, in at least one repetition, the value of this metric was *nan* or infinite, which (in our case) can occur if no examples are predicted as positive or there are no true positive predictions.

| Species             | Antibiotic           | Genomes           | $k$ -mers (millions) | Method             | Accuracy          | Sensitivity       | Specificity       | F1 score               | Complexity              |                   |                         |                    |
|---------------------|----------------------|-------------------|----------------------|--------------------|-------------------|-------------------|-------------------|------------------------|-------------------------|-------------------|-------------------------|--------------------|
| <i>A. baumannii</i> | amikacin             | 256               | 14.6                 | L1-logicistic      | 0.835 $\pm$ 0.064 | 0.880 $\pm$ 0.072 | 0.663 $\pm$ 0.192 | 0.893 $\pm$ 0.048      | 4575.7 $\pm$ 6046.6     |                   |                         |                    |
|                     |                      |                   |                      | L2-logicistic      | 0.861 $\pm$ 0.051 | 0.890 $\pm$ 0.058 | 0.740 $\pm$ 0.155 | 0.909 $\pm$ 0.038      | all*                    |                   |                         |                    |
|                     |                      |                   |                      | Majority           | 0.790 $\pm$ 0.045 | 1.000 $\pm$ 0.000 | 0.000 $\pm$ 0.000 | 0.882 $\pm$ 0.029      | –                       |                   |                         |                    |
|                     |                      |                   |                      | Naive Bayes        | 0.725 $\pm$ 0.049 | 0.780 $\pm$ 0.051 | 0.533 $\pm$ 0.095 | 0.817 $\pm$ 0.036      | all                     |                   |                         |                    |
|                     |                      |                   |                      | PolySVM            | 0.865 $\pm$ 0.051 | 0.902 $\pm$ 0.056 | 0.717 $\pm$ 0.173 | 0.912 $\pm$ 0.038      | all                     |                   |                         |                    |
|                     |                      |                   |                      | CART <sub>b</sub>  | 0.855 $\pm$ 0.041 | 0.898 $\pm$ 0.037 | 0.698 $\pm$ 0.179 | 0.907 $\pm$ 0.027      | 2.5 $\pm$ 0.5           |                   |                         |                    |
|                     |                      |                   |                      | CART <sub>cv</sub> | 0.867 $\pm$ 0.041 | 0.905 $\pm$ 0.045 | 0.719 $\pm$ 0.188 | 0.914 $\pm$ 0.029      | 4.1 $\pm$ 1.7           |                   |                         |                    |
|                     |                      |                   |                      | SCM <sub>b</sub>   | 0.843 $\pm$ 0.044 | 0.878 $\pm$ 0.035 | 0.725 $\pm$ 0.129 | 0.898 $\pm$ 0.032      | 2.1 $\pm$ 0.3           |                   |                         |                    |
|                     |                      |                   |                      | SCM <sub>cv</sub>  | 0.837 $\pm$ 0.043 | 0.886 $\pm$ 0.048 | 0.615 $\pm$ 0.228 | 0.895 $\pm$ 0.030      | 5.5 $\pm$ 2.6           |                   |                         |                    |
|                     |                      |                   |                      | L1-logicistic      | 0.823 $\pm$ 0.067 | 0.842 $\pm$ 0.075 | 0.756 $\pm$ 0.190 | 0.876 $\pm$ 0.046      | 106216.1 $\pm$ 233553.8 |                   |                         |                    |
|                     |                      |                   |                      | L2-logicistic      | 0.835 $\pm$ 0.056 | 0.867 $\pm$ 0.069 | 0.743 $\pm$ 0.160 | 0.887 $\pm$ 0.039      | all*                    |                   |                         |                    |
|                     |                      |                   |                      | Majority           | 0.748 $\pm$ 0.042 | 1.000 $\pm$ 0.000 | 0.000 $\pm$ 0.000 | 0.855 $\pm$ 0.028      | –                       |                   |                         |                    |
|                     | ampicillin/sulbactam | 155               | 11.1                 | Naive Bayes        | 0.797 $\pm$ 0.071 | 0.902 $\pm$ 0.082 | 0.492 $\pm$ 0.175 | 0.868 $\pm$ 0.050      | all                     |                   |                         |                    |
|                     |                      |                   |                      | PolySVM            | 0.829 $\pm$ 0.053 | 0.867 $\pm$ 0.059 | 0.722 $\pm$ 0.140 | 0.883 $\pm$ 0.040      | all                     |                   |                         |                    |
|                     |                      |                   |                      | CART <sub>b</sub>  | 0.752 $\pm$ 0.046 | 0.811 $\pm$ 0.076 | 0.586 $\pm$ 0.285 | 0.830 $\pm$ 0.030      | 1.0 $\pm$ 0.0           |                   |                         |                    |
|                     |                      |                   |                      | CART <sub>cv</sub> | 0.810 $\pm$ 0.084 | 0.846 $\pm$ 0.100 | 0.707 $\pm$ 0.141 | 0.867 $\pm$ 0.063      | 7.3 $\pm$ 2.9           |                   |                         |                    |
|                     |                      |                   |                      | SCM <sub>b</sub>   | 0.768 $\pm$ 0.060 | 0.841 $\pm$ 0.073 | 0.562 $\pm$ 0.227 | 0.843 $\pm$ 0.042      | 1.0 $\pm$ 0.0           |                   |                         |                    |
|                     |                      |                   |                      | SCM <sub>cv</sub>  | 0.787 $\pm$ 0.049 | 0.842 $\pm$ 0.067 | 0.624 $\pm$ 0.218 | 0.855 $\pm$ 0.031      | 5.6 $\pm$ 2.4           |                   |                         |                    |
|                     |                      |                   |                      | carbapenem         | 232               | 35.5              | L1-logicistic     | 0.943 $\pm$ 0.040      | 0.937 $\pm$ 0.043       | 0.948 $\pm$ 0.047 | 0.949 $\pm$ 0.037       | 1075.4 $\pm$ 627.9 |
|                     |                      |                   |                      |                    |                   |                   | L2-logicistic     | 0.943 $\pm$ 0.046      | 0.945 $\pm$ 0.048       | 0.942 $\pm$ 0.049 | 0.950 $\pm$ 0.038       | all*               |
|                     |                      |                   |                      |                    |                   |                   | Majority          | 0.520 $\pm$ 0.094      | 0.900 $\pm$ 0.316       | 0.100 $\pm$ 0.316 | –                       | –                  |
|                     |                      |                   |                      |                    |                   |                   | Naive Bayes       | 0.904 $\pm$ 0.026      | 0.977 $\pm$ 0.032       | 0.810 $\pm$ 0.056 | 0.918 $\pm$ 0.025       | all                |
|                     |                      |                   |                      |                    |                   |                   | PolySVM           | 0.948 $\pm$ 0.040      | 0.949 $\pm$ 0.046       | 0.940 $\pm$ 0.055 | 0.954 $\pm$ 0.036       | all                |
|                     |                      |                   |                      |                    |                   |                   | CART <sub>b</sub> | 0.915 $\pm$ 0.052      | 0.905 $\pm$ 0.054       | 0.925 $\pm$ 0.078 | 0.922 $\pm$ 0.049       | 2.0 $\pm$ 0.0      |
|                     | ceftazidime          | 277               | 14.4                 | CART <sub>cv</sub> | 0.915 $\pm$ 0.054 | 0.918 $\pm$ 0.061 | 0.910 $\pm$ 0.070 | 0.923 $\pm$ 0.049      | 2.2 $\pm$ 1.5           |                   |                         |                    |
|                     |                      |                   |                      | SCM <sub>b</sub>   | 0.922 $\pm$ 0.047 | 0.914 $\pm$ 0.042 | 0.929 $\pm$ 0.078 | 0.929 $\pm$ 0.041      | 2.0 $\pm$ 0.0           |                   |                         |                    |
|                     |                      |                   |                      | SCM <sub>cv</sub>  | 0.924 $\pm$ 0.040 | 0.917 $\pm$ 0.050 | 0.923 $\pm$ 0.062 | 0.928 $\pm$ 0.040      | 3.5 $\pm$ 1.1           |                   |                         |                    |
|                     |                      |                   |                      | L1-logicistic      | 0.944 $\pm$ 0.034 | 0.990 $\pm$ 0.017 | 0.511 $\pm$ 0.288 | 0.969 $\pm$ 0.018      | 153574.8 $\pm$ 295176.4 |                   |                         |                    |
|                     |                      |                   |                      | L2-logicistic      | 0.927 $\pm$ 0.049 | 0.968 $\pm$ 0.047 | 0.548 $\pm$ 0.310 | 0.960 $\pm$ 0.029      | all*                    |                   |                         |                    |
|                     |                      |                   |                      | Majority           | 0.907 $\pm$ 0.035 | 1.000 $\pm$ 0.000 | 0.000 $\pm$ 0.000 | 0.951 $\pm$ 0.019      | –                       |                   |                         |                    |
|                     |                      |                   |                      | Naive Bayes        | 0.871 $\pm$ 0.039 | 0.858 $\pm$ 0.041 | 1.000 $\pm$ 0.000 | 0.923 $\pm$ 0.024      | all                     |                   |                         |                    |
|                     |                      |                   |                      | PolySVM            | 0.942 $\pm$ 0.032 | 0.982 $\pm$ 0.029 | 0.562 $\pm$ 0.284 | 0.968 $\pm$ 0.017      | all                     |                   |                         |                    |
|                     |                      |                   |                      | CART <sub>b</sub>  | 0.947 $\pm$ 0.026 | 0.984 $\pm$ 0.022 | 0.593 $\pm$ 0.229 | 0.971 $\pm$ 0.014      | 1.1 $\pm$ 0.3           |                   |                         |                    |
|                     |                      |                   |                      | CART <sub>cv</sub> | 0.951 $\pm$ 0.047 | 0.974 $\pm$ 0.042 | 0.736 $\pm$ 0.280 | 0.973 $\pm$ 0.027      | 2.3 $\pm$ 1.3           |                   |                         |                    |
|                     |                      |                   |                      | SCM <sub>b</sub>   | 0.940 $\pm$ 0.043 | 0.976 $\pm$ 0.043 | 0.593 $\pm$ 0.229 | 0.967 $\pm$ 0.024      | 1.2 $\pm$ 0.4           |                   |                         |                    |
|                     |                      |                   |                      | SCM <sub>cv</sub>  | 0.935 $\pm$ 0.042 | 0.967 $\pm$ 0.042 | 0.660 $\pm$ 0.277 | 0.964 $\pm$ 0.024      | 1.7 $\pm$ 1.1           |                   |                         |                    |
| imipenem            | 499                  | 42.4              | L1-logicistic        | 0.880 $\pm$ 0.029  | 0.915 $\pm$ 0.031 | 0.819 $\pm$ 0.059 | 0.907 $\pm$ 0.025 | 3980.5 $\pm$ 4676.0    |                         |                   |                         |                    |
|                     |                      |                   | L2-logicistic        | 0.885 $\pm$ 0.034  | 0.906 $\pm$ 0.038 | 0.851 $\pm$ 0.070 | 0.909 $\pm$ 0.029 | all*                   |                         |                   |                         |                    |
|                     |                      |                   | Majority             | 0.644 $\pm$ 0.037  | 1.000 $\pm$ 0.000 | 0.000 $\pm$ 0.000 | 0.783 $\pm$ 0.028 | –                      |                         |                   |                         |                    |
|                     |                      |                   | Naive Bayes          | 0.822 $\pm$ 0.027  | 0.912 $\pm$ 0.031 | 0.661 $\pm$ 0.057 | 0.868 $\pm$ 0.023 | all                    |                         |                   |                         |                    |
|                     |                      |                   | PolySVM              | 0.886 $\pm$ 0.031  | 0.917 $\pm$ 0.028 | 0.832 $\pm$ 0.072 | 0.912 $\pm$ 0.024 | all                    |                         |                   |                         |                    |
|                     |                      |                   | CART <sub>b</sub>    | 0.864 $\pm$ 0.042  | 0.915 $\pm$ 0.039 | 0.773 $\pm$ 0.110 | 0.896 $\pm$ 0.032 | 3.4 $\pm$ 0.7          |                         |                   |                         |                    |
|                     |                      |                   | CART <sub>cv</sub>   | 0.863 $\pm$ 0.041  | 0.910 $\pm$ 0.035 | 0.780 $\pm$ 0.085 | 0.894 $\pm$ 0.033 | 9.6 $\pm$ 5.0          |                         |                   |                         |                    |
|                     |                      |                   | SCM <sub>b</sub>     | 0.849 $\pm$ 0.031  | 0.926 $\pm$ 0.020 | 0.711 $\pm$ 0.078 | 0.888 $\pm$ 0.023 | 2.7 $\pm$ 0.5          |                         |                   |                         |                    |
|                     |                      |                   | SCM <sub>cv</sub>    | 0.857 $\pm$ 0.039  | 0.912 $\pm$ 0.046 | 0.759 $\pm$ 0.075 | 0.890 $\pm$ 0.033 | 10.6 $\pm$ 5.2         |                         |                   |                         |                    |
|                     |                      |                   | meropenem            | 236                | 13.4              | L1-logicistic     | 0.896 $\pm$ 0.048 | 0.933 $\pm$ 0.042      | 0.628 $\pm$ 0.208       | 0.940 $\pm$ 0.028 | 167820.2 $\pm$ 298168.7 |                    |
|                     |                      |                   |                      |                    |                   | L2-logicistic     | 0.887 $\pm$ 0.049 | 0.932 $\pm$ 0.046      | 0.560 $\pm$ 0.240       | 0.935 $\pm$ 0.030 | all*                    |                    |
|                     |                      |                   |                      |                    |                   | Majority          | 0.881 $\pm$ 0.025 | 1.000 $\pm$ 0.000      | 0.000 $\pm$ 0.000       | 0.936 $\pm$ 0.014 | –                       |                    |
| Naive Bayes         | 0.791 $\pm$ 0.048    | 0.836 $\pm$ 0.054 |                      |                    |                   | 0.451 $\pm$ 0.269 | 0.876 $\pm$ 0.030 | all                    |                         |                   |                         |                    |
| PolySVM             | 0.900 $\pm$ 0.050    | 0.945 $\pm$ 0.019 |                      |                    |                   | 0.580 $\pm$ 0.364 | 0.944 $\pm$ 0.027 | all                    |                         |                   |                         |                    |
| CART <sub>b</sub>   | 0.874 $\pm$ 0.032    | 0.964 $\pm$ 0.040 |                      |                    |                   | 0.245 $\pm$ 0.334 | 0.931 $\pm$ 0.017 | 0.9 $\pm$ 0.9          |                         |                   |                         |                    |
| tobramycin          | 249                  | 15.2              | CART <sub>cv</sub>   | 0.900 $\pm$ 0.032  | 0.943 $\pm$ 0.036 | 0.583 $\pm$ 0.220 | 0.943 $\pm$ 0.018 | 6.5 $\pm$ 2.9          |                         |                   |                         |                    |
|                     |                      |                   | SCM <sub>b</sub>     | 0.896 $\pm$ 0.038  | 0.947 $\pm$ 0.029 | 0.499 $\pm$ 0.327 | 0.941 $\pm$ 0.021 | 1.5 $\pm$ 0.5          |                         |                   |                         |                    |
|                     |                      |                   | SCM <sub>cv</sub>    | 0.889 $\pm$ 0.036  | 0.943 $\pm$ 0.041 | 0.507 $\pm$ 0.255 | 0.938 $\pm$ 0.020 | 4.5 $\pm$ 2.5          |                         |                   |                         |                    |
|                     |                      |                   | L1-logicistic        | 0.863 $\pm$ 0.019  | 0.905 $\pm$ 0.047 | 0.648 $\pm$ 0.159 | 0.918 $\pm$ 0.012 | 70944.3 $\pm$ 159229.9 |                         |                   |                         |                    |
|                     |                      |                   | L2-logicistic        | 0.857 $\pm$ 0.049  | 0.882 $\pm$ 0.063 | 0.741 $\pm$ 0.140 | 0.912 $\pm$ 0.030 | all*                   |                         |                   |                         |                    |
|                     |                      |                   | Majority             | 0.849 $\pm$ 0.034  | 1.000 $\pm$ 0.000 | 0.000 $\pm$ 0.000 | 0.918 $\pm$ 0.020 | –                      |                         |                   |                         |                    |
|                     |                      |                   | Naive Bayes          | 0.733 $\pm$ 0.049  | 0.784 $\pm$ 0.067 | 0.457 $\pm$ 0.208 | 0.831 $\pm$ 0.038 | all                    |                         |                   |                         |                    |
|                     |                      |                   | PolySVM              | 0.873 $\pm$ 0.054  | 0.921 $\pm$ 0.055 | 0.606 $\pm$ 0.226 | 0.925 $\pm$ 0.032 | all                    |                         |                   |                         |                    |
|                     |                      |                   | CART <sub>b</sub>    | 0.841 $\pm$ 0.041  | 0.936 $\pm$ 0.050 | 0.342 $\pm$ 0.307 | 0.909 $\pm$ 0.024 | 1.5 $\pm$ 0.7          |                         |                   |                         |                    |
|                     |                      |                   | CART <sub>cv</sub>   | 0.841 $\pm$ 0.051  | 0.881 $\pm$ 0.059 | 0.627 $\pm$ 0.138 | 0.903 $\pm$ 0.032 | 6.8 $\pm$ 2.3          |                         |                   |                         |                    |
|                     |                      |                   | SCM <sub>b</sub>     | 0.847 $\pm$ 0.040  | 0.924 $\pm$ 0.042 | 0.441 $\pm$ 0.272 | 0.911 $\pm$ 0.023 | 1.7 $\pm$ 0.5          |                         |                   |                         |                    |
|                     |                      |                   | SCM <sub>cv</sub>    | 0.841 $\pm$ 0.049  | 0.871 $\pm$ 0.061 | 0.698 $\pm$ 0.187 | 0.902 $\pm$ 0.031 | 6.0 $\pm$ 2.9          |                         |                   |                         |                    |
| <i>E. coli</i>      | amoxicillin          | 1095              | 39.7                 | L1-logicistic      | 0.900 $\pm$ 0.029 | 0.874 $\pm$ 0.028 | 0.942 $\pm$ 0.054 | 0.914 $\pm$ 0.026      | 1861.0 $\pm$ 4505.5     |                   |                         |                    |

Continued on next page

**Table S1. (Continued)**

| Species            | Antibiotic  | Genomes     | <i>k</i> -mers (millions) | Method             | Accuracy    | Sensitivity | Specificity | F1 score      | Complexity         |
|--------------------|-------------|-------------|---------------------------|--------------------|-------------|-------------|-------------|---------------|--------------------|
|                    |             |             |                           | L2-logicistic      | 0.888±0.022 | 0.873±0.028 | 0.912±0.040 | 0.905±0.020   | all*               |
|                    |             |             |                           | Majority           | 0.614±0.025 | 1.000±0.000 | 0.000±0.000 | 0.761±0.020   | –                  |
|                    |             |             |                           | Naive Bayes        | 0.603±0.025 | 0.552±0.025 | 0.685±0.043 | 0.630±0.027   | all                |
|                    |             |             |                           | PolySVM            | 0.869±0.032 | 0.888±0.029 | 0.842±0.058 | 0.893±0.027   | all                |
|                    |             |             |                           | CART <sub>b</sub>  | 0.923±0.018 | 0.891±0.026 | 0.973±0.011 | 0.934±0.016   | 3.6 ± 0.5          |
|                    |             |             |                           | CART <sub>cv</sub> | 0.919±0.022 | 0.889±0.024 | 0.966±0.027 | 0.930±0.019   | 4.1 ± 1.7          |
|                    |             |             |                           | SCM <sub>b</sub>   | 0.920±0.016 | 0.893±0.025 | 0.962±0.014 | 0.932±0.015   | 4.1 ± 0.7          |
|                    |             |             |                           | SCM <sub>cv</sub>  | 0.920±0.021 | 0.891±0.023 | 0.966±0.028 | 0.932±0.019   | 4.0 ± 1.2          |
|                    |             |             |                           | L1-logicistic      | 0.792±0.018 | 0.746±0.075 | 0.812±0.026 | 0.683±0.040   | 3727.2 ± 5890.3    |
|                    |             |             |                           |                    |             |             |             | L2-logicistic | 0.789±0.022        |
| Majority           | 0.697±0.014 | 0.000±0.000 | 1.000±0.000               |                    |             |             |             | –             | –                  |
| Naive Bayes        | 0.634±0.026 | 0.596±0.035 | 0.652±0.054               |                    |             |             |             | 0.497±0.017   | all                |
| PolySVM            | 0.779±0.022 | 0.604±0.070 | 0.856±0.020               |                    |             |             |             | 0.622±0.043   | all                |
| CART <sub>b</sub>  | 0.808±0.021 | 0.563±0.075 | 0.915±0.041               |                    |             |             |             | 0.638±0.040   | 7.0 ± 0.7          |
| CART <sub>cv</sub> | 0.812±0.019 | 0.533±0.101 | 0.933±0.052               |                    |             |             |             | 0.627±0.047   | 13.3 ± 7.7         |
| SCM <sub>b</sub>   | 0.818±0.019 | 0.464±0.050 | 0.972±0.014               |                    |             |             |             | 0.606±0.041   | 4.6 ± 1.1          |
| SCM <sub>cv</sub>  | 0.830±0.023 | 0.467±0.059 | 0.988±0.010               |                    |             |             |             | 0.623±0.054   | 6.2 ± 1.9          |
| L1-logicistic      | 0.926±0.029 | 0.905±0.052 | 0.964±0.031               |                    |             |             |             | 0.937±0.027   | 3006.9 ± 2011.3    |
| L2-logicistic      | 0.908±0.038 | 0.900±0.051 | 0.920±0.049               |                    |             |             |             | 0.922±0.034   | all*               |
|                    |             |             |                           | Majority           | 0.610±0.040 | 1.000±0.000 | 0.000±0.000 | 0.757±0.031   | –                  |
|                    |             |             |                           | Naive Bayes        | 0.629±0.036 | 0.615±0.058 | 0.651±0.075 | 0.668±0.035   | all                |
|                    |             |             |                           | PolySVM            | 0.826±0.029 | 0.839±0.046 | 0.808±0.035 | 0.855±0.025   | all                |
|                    |             |             |                           | CART <sub>b</sub>  | 0.906±0.037 | 0.902±0.044 | 0.910±0.062 | 0.921±0.033   | 2.2 ± 0.6          |
|                    |             |             |                           | CART <sub>cv</sub> | 0.916±0.036 | 0.912±0.042 | 0.922±0.065 | 0.930±0.029   | 3.1 ± 1.7          |
|                    |             |             |                           | SCM <sub>b</sub>   | 0.911±0.040 | 0.912±0.048 | 0.911±0.063 | 0.926±0.035   | 2.2 ± 0.6          |
|                    |             |             |                           | SCM <sub>cv</sub>  | 0.933±0.040 | 0.933±0.043 | 0.936±0.065 | 0.944±0.033   | 3.5 ± 1.4          |
|                    |             |             |                           | L1-logicistic      | 0.954±0.011 | 0.673±0.148 | 0.984±0.010 | 0.725±0.088   | 13896.1 ± 22296.9  |
|                    |             |             |                           | L2-logicistic      | 0.953±0.024 | 0.649±0.173 | 0.985±0.011 | 0.713±0.153   | all*               |
|                    |             |             |                           | Majority           | 0.906±0.018 | 0.000±0.000 | 1.000±0.000 | –             | –                  |
|                    |             |             |                           | Naive Bayes        | 0.765±0.086 | 0.854±0.135 | 0.755±0.089 | 0.418±0.128   | all                |
|                    |             |             |                           | PolySVM            | 0.934±0.024 | 0.497±0.223 | 0.980±0.025 | 0.556±0.207   | all                |
|                    |             |             |                           | CART <sub>b</sub>  | 0.960±0.021 | 0.696±0.118 | 0.988±0.012 | 0.768±0.105   | 1.0 ± 0.0          |
|                    |             |             |                           | CART <sub>cv</sub> | 0.958±0.023 | 0.696±0.118 | 0.985±0.015 | 0.759±0.108   | 1.6 ± 1.3          |
|                    |             |             |                           | SCM <sub>b</sub>   | 0.960±0.021 | 0.696±0.118 | 0.988±0.012 | 0.768±0.105   | 1.0 ± 0.0          |
|                    |             |             |                           | SCM <sub>cv</sub>  | 0.958±0.021 | 0.710±0.110 | 0.984±0.012 | 0.760±0.101   | 1.8 ± 1.0          |
|                    |             |             |                           | L1-logicistic      | 0.804±0.056 | 0.548±0.149 | 0.884±0.050 | 0.571±0.124   | 592.7 ± 753.2      |
|                    |             |             |                           | L2-logicistic      | 0.812±0.074 | 0.565±0.157 | 0.893±0.058 | 0.594±0.150   | all*               |
|                    |             |             |                           | Majority           | 0.752±0.056 | 0.000±0.000 | 1.000±0.000 | –             | –                  |
|                    |             |             |                           | Naive Bayes        | 0.834±0.045 | 0.558±0.156 | 0.919±0.046 | 0.613±0.126   | all                |
|                    |             |             |                           | PolySVM            | 0.840±0.037 | 0.485±0.114 | 0.955±0.025 | 0.589±0.118   | all                |
|                    |             |             |                           | CART <sub>b</sub>  | 0.836±0.048 | 0.530±0.131 | 0.933±0.041 | 0.608±0.128   | 1.0 ± 0.0          |
|                    |             |             |                           | CART <sub>cv</sub> | 0.836±0.044 | 0.524±0.120 | 0.936±0.041 | 0.601±0.124   | 2.0 ± 1.5          |
|                    |             |             |                           | SCM <sub>b</sub>   | 0.830±0.047 | 0.520±0.137 | 0.927±0.034 | 0.594±0.130   | 1.0 ± 0.0          |
|                    |             |             |                           | SCM <sub>cv</sub>  | 0.840±0.057 | 0.538±0.092 | 0.941±0.045 | 0.626±0.106   | 3.2 ± 1.4          |
|                    |             |             |                           | L1-logicistic      | 0.971±0.022 | 0.825±0.163 | 0.981±0.021 | 0.795±0.133   | 3594.5 ± 4097.0    |
|                    |             |             |                           | L2-logicistic      | 0.975±0.019 | 0.754±0.215 | 0.990±0.013 | 0.786±0.205   | all*               |
|                    |             |             |                           | Majority           | 0.934±0.019 | 0.000±0.000 | 1.000±0.000 | –             | –                  |
|                    |             |             |                           | Naive Bayes        | 0.782±0.049 | 0.679±0.197 | 0.790±0.052 | 0.293±0.115   | all                |
|                    |             |             |                           | PolySVM            | 0.966±0.015 | 0.576±0.259 | 0.994±0.009 | 0.657±0.188   | all                |
|                    |             |             |                           | CART <sub>b</sub>  | 0.966±0.016 | 0.728±0.144 | 0.982±0.017 | 0.736±0.083   | 1.4 ± 0.7          |
|                    |             |             |                           | CART <sub>cv</sub> | 0.973±0.014 | 0.841±0.153 | 0.982±0.012 | 0.800±0.100   | 3.4 ± 1.2          |
|                    |             |             |                           | SCM <sub>b</sub>   | 0.964±0.017 | 0.705±0.199 | 0.981±0.017 | 0.709±0.130   | 1.5 ± 0.5          |
|                    |             |             |                           | SCM <sub>cv</sub>  | 0.965±0.018 | 0.768±0.299 | 0.978±0.018 | –             | 2.1 ± 0.3          |
|                    |             |             |                           | L1-logicistic      | 0.976±0.009 | 0.860±0.088 | 0.988±0.006 | 0.873±0.060   | 67531.0 ± 138221.3 |
|                    |             |             |                           | L2-logicistic      | 0.973±0.010 | 0.860±0.086 | 0.985±0.006 | 0.859±0.062   | all*               |
|                    |             |             |                           | Majority           | 0.898±0.018 | 0.000±0.000 | 1.000±0.000 | –             | –                  |
|                    |             |             |                           | Naive Bayes        | 0.830±0.048 | 0.754±0.105 | 0.837±0.061 | 0.477±0.060   | all                |
|                    |             |             |                           | PolySVM            | 0.971±0.011 | 0.816±0.101 | 0.988±0.006 | 0.846±0.067   | all                |
|                    |             |             |                           | CART <sub>b</sub>  | 0.973±0.009 | 0.782±0.089 | 0.994±0.004 | 0.849±0.058   | 2.8 ± 0.9          |
|                    |             |             |                           | CART <sub>cv</sub> | 0.979±0.008 | 0.858±0.092 | 0.993±0.003 | 0.890±0.051   | 6.0 ± 2.4          |
|                    |             |             |                           | SCM <sub>b</sub>   | 0.974±0.007 | 0.786±0.074 | 0.995±0.004 | 0.858±0.044   | 3.0 ± 1.1          |
|                    |             |             |                           | SCM <sub>cv</sub>  | 0.980±0.009 | 0.860±0.094 | 0.993±0.003 | 0.892±0.053   | 5.2 ± 1.2          |
|                    |             |             |                           | L1-logicistic      | 0.964±0.025 | 0.682±0.232 | 0.982±0.017 | 0.686±0.198   | 1584.0 ± 3147.2    |
|                    |             |             |                           | L2-logicistic      | 0.945±0.021 | 0.489±0.219 | 0.974±0.018 | 0.500±0.175   | all*               |
|                    |             |             |                           | Majority           | 0.940±0.015 | 0.000±0.000 | 1.000±0.000 | –             | –                  |
|                    |             |             |                           | Naive Bayes        | 0.810±0.038 | 0.381±0.234 | 0.836±0.036 | –             | all                |
|                    |             |             |                           | PolySVM            | 0.965±0.012 | 0.400±0.258 | 0.999±0.004 | –             | all                |
|                    |             |             |                           | CART <sub>b</sub>  | 0.973±0.018 | 0.794±0.130 | 0.985±0.013 | 0.782±0.131   | 1.0 ± 0.0          |
|                    |             |             |                           | CART <sub>cv</sub> | 0.971±0.017 | 0.799±0.129 | 0.982±0.015 | 0.769±0.123   | 1.7 ± 0.9          |
|                    |             |             |                           | SCM <sub>b</sub>   | 0.973±0.018 | 0.794±0.130 | 0.985±0.013 | 0.782±0.131   | 1.0 ± 0.0          |
|                    |             |             |                           | SCM <sub>cv</sub>  | 0.982±0.014 | 0.744±0.182 | 0.996±0.012 | 0.816±0.143   | 2.0 ± 0.0          |
|                    |             |             |                           | L1-logicistic      | 0.833±0.021 | 0.333±0.289 | 0.928±0.065 | –             | 11536.9 ± 14007.2  |
|                    |             |             |                           | L2-logicistic      | 0.830±0.028 | 0.504±0.111 | 0.893±0.036 | 0.486±0.085   | all*               |
| Majority           | 0.838±0.020 | 0.000±0.000 | 1.000±0.000               | –                  | –           |             |             |               |                    |

Continued on next page

**Table S1.** (Continued)

| Species            | Antibiotic    | Genomes       | <i>k</i> -mers<br>(millions) | Method        | Accuracy          | Sensitivity   | Specificity   | F1 score           | Complexity |
|--------------------|---------------|---------------|------------------------------|---------------|-------------------|---------------|---------------|--------------------|------------|
| ceftazidime        | 1497          | 48.8          | Naive Bayes                  | 0.793 ± 0.022 | 0.578 ± 0.096     | 0.834 ± 0.031 | 0.472 ± 0.054 | all                |            |
|                    |               |               | PolySVM                      | 0.880 ± 0.018 | 0.395 ± 0.073     | 0.974 ± 0.013 | 0.514 ± 0.083 | all                |            |
|                    |               |               | CART <sub>b</sub>            | 0.913 ± 0.015 | 0.502 ± 0.055     | 0.992 ± 0.004 | 0.650 ± 0.053 | 3.0 ± 0.5          |            |
|                    |               |               | CART <sub>cv</sub>           | 0.916 ± 0.011 | 0.534 ± 0.058     | 0.990 ± 0.006 | 0.672 ± 0.047 | 5.5 ± 1.4          |            |
|                    |               |               | SCM <sub>b</sub>             | 0.915 ± 0.015 | 0.515 ± 0.052     | 0.992 ± 0.004 | 0.660 ± 0.051 | 3.4 ± 0.8          |            |
|                    |               |               | SCM <sub>cv</sub>            | 0.917 ± 0.012 | 0.545 ± 0.064     | 0.989 ± 0.004 | 0.679 ± 0.052 | 5.5 ± 1.2          |            |
|                    |               |               | L1-logistic                  | 0.976 ± 0.010 | 0.794 ± 0.136     | 0.989 ± 0.007 | 0.812 ± 0.093 | 47016.4 ± 110544.7 |            |
|                    |               |               | L2-logistic                  | 0.974 ± 0.008 | 0.743 ± 0.126     | 0.990 ± 0.008 | 0.786 ± 0.087 | all*               |            |
|                    |               |               | Majority                     | 0.932 ± 0.010 | 0.000 ± 0.000     | 1.000 ± 0.000 | –             | –                  |            |
|                    |               |               | Naive Bayes                  | 0.768 ± 0.023 | 0.905 ± 0.114     | 0.758 ± 0.025 | 0.343 ± 0.047 | all                |            |
|                    |               |               | PolySVM                      | 0.966 ± 0.008 | 0.636 ± 0.097     | 0.990 ± 0.009 | 0.710 ± 0.080 | all                |            |
|                    |               |               | CART <sub>b</sub>            | 0.976 ± 0.010 | 0.723 ± 0.140     | 0.994 ± 0.004 | 0.789 ± 0.105 | 2.8 ± 0.4          |            |
|                    |               |               | CART <sub>cv</sub>           | 0.983 ± 0.005 | 0.826 ± 0.082     | 0.994 ± 0.006 | 0.867 ± 0.045 | 5.8 ± 1.9          |            |
|                    |               |               | SCM <sub>b</sub>             | 0.979 ± 0.010 | 0.730 ± 0.128     | 0.996 ± 0.004 | 0.814 ± 0.101 | 2.8 ± 0.6          |            |
|                    |               |               | SCM <sub>cv</sub>            | 0.985 ± 0.005 | 0.830 ± 0.065     | 0.996 ± 0.005 | 0.882 ± 0.043 | 3.8 ± 0.6          |            |
|                    |               |               | L1-logistic                  | 0.986 ± 0.006 | 0.949 ± 0.028     | 0.995 ± 0.005 | 0.962 ± 0.018 | 432.7 ± 1043.6     |            |
|                    |               |               | L2-logistic                  | 0.963 ± 0.012 | 0.868 ± 0.065     | 0.986 ± 0.010 | 0.900 ± 0.031 | all*               |            |
|                    |               |               | Majority                     | 0.806 ± 0.021 | 0.000 ± 0.000     | 1.000 ± 0.000 | –             | –                  |            |
|                    |               |               | Naive Bayes                  | 0.835 ± 0.029 | 0.911 ± 0.052     | 0.817 ± 0.043 | 0.682 ± 0.048 | all                |            |
|                    |               |               | PolySVM                      | 0.965 ± 0.014 | 0.845 ± 0.061     | 0.994 ± 0.006 | 0.902 ± 0.035 | all                |            |
|                    |               |               | CART <sub>b</sub>            | 0.985 ± 0.005 | 0.938 ± 0.022     | 0.996 ± 0.005 | 0.960 ± 0.013 | 2.0 ± 0.0          |            |
|                    |               |               | CART <sub>cv</sub>           | 0.983 ± 0.005 | 0.935 ± 0.022     | 0.996 ± 0.005 | 0.957 ± 0.012 | 2.2 ± 0.4          |            |
|                    |               |               | SCM <sub>b</sub>             | 0.983 ± 0.005 | 0.938 ± 0.022     | 0.995 ± 0.005 | 0.956 ± 0.013 | 2.0 ± 0.0          |            |
|                    |               |               | SCM <sub>cv</sub>            | 0.983 ± 0.004 | 0.939 ± 0.023     | 0.995 ± 0.005 | 0.957 ± 0.010 | 2.7 ± 1.1          |            |
| L1-logistic        | 0.983 ± 0.007 | 0.896 ± 0.053 | 0.991 ± 0.005                | 0.891 ± 0.043 | 5673.3 ± 13968.4  |               |               |                    |            |
| L2-logistic        | 0.979 ± 0.007 | 0.851 ± 0.068 | 0.991 ± 0.005                | 0.864 ± 0.045 | all*              |               |               |                    |            |
| Majority           | 0.923 ± 0.011 | 0.000 ± 0.000 | 1.000 ± 0.000                | –             | –                 |               |               |                    |            |
| Naive Bayes        | 0.687 ± 0.037 | 0.824 ± 0.048 | 0.676 ± 0.043                | 0.289 ± 0.038 | all               |               |               |                    |            |
| PolySVM            | 0.956 ± 0.014 | 0.614 ± 0.152 | 0.986 ± 0.006                | 0.676 ± 0.104 | all               |               |               |                    |            |
| CART <sub>b</sub>  | 0.986 ± 0.006 | 0.898 ± 0.061 | 0.994 ± 0.004                | 0.907 ± 0.046 | 2.0 ± 0.0         |               |               |                    |            |
| CART <sub>cv</sub> | 0.985 ± 0.009 | 0.893 ± 0.064 | 0.993 ± 0.007                | 0.898 ± 0.063 | 2.4 ± 1.3         |               |               |                    |            |
| SCM <sub>b</sub>   | 0.986 ± 0.006 | 0.898 ± 0.061 | 0.994 ± 0.004                | 0.907 ± 0.046 | 2.0 ± 0.0         |               |               |                    |            |
| SCM <sub>cv</sub>  | 0.986 ± 0.007 | 0.898 ± 0.061 | 0.993 ± 0.005                | 0.905 ± 0.049 | 2.2 ± 0.6         |               |               |                    |            |
| L1-logistic        | 0.982 ± 0.013 | 0.963 ± 0.078 | 0.983 ± 0.015                | 0.844 ± 0.093 | 445.5 ± 394.3     |               |               |                    |            |
| L2-logistic        | 0.976 ± 0.011 | 0.787 ± 0.189 | 0.987 ± 0.009                | 0.761 ± 0.118 | all*              |               |               |                    |            |
| Majority           | 0.949 ± 0.012 | 0.000 ± 0.000 | 1.000 ± 0.000                | –             | –                 |               |               |                    |            |
| Naive Bayes        | 0.811 ± 0.046 | 0.838 ± 0.121 | 0.809 ± 0.047                | 0.316 ± 0.101 | all               |               |               |                    |            |
| PolySVM            | 0.984 ± 0.009 | 0.770 ± 0.184 | 0.996 ± 0.006                | 0.823 ± 0.098 | all               |               |               |                    |            |
| CART <sub>b</sub>  | 0.978 ± 0.013 | 0.922 ± 0.130 | 0.981 ± 0.014                | 0.802 ± 0.097 | 1.4 ± 0.5         |               |               |                    |            |
| CART <sub>cv</sub> | 0.976 ± 0.013 | 0.907 ± 0.158 | 0.981 ± 0.014                | 0.791 ± 0.103 | 1.6 ± 1.1         |               |               |                    |            |
| SCM <sub>b</sub>   | 0.978 ± 0.013 | 0.922 ± 0.130 | 0.981 ± 0.014                | 0.802 ± 0.097 | 1.1 ± 0.3         |               |               |                    |            |
| SCM <sub>cv</sub>  | 0.973 ± 0.012 | 0.840 ± 0.152 | 0.981 ± 0.016                | 0.758 ± 0.069 | 1.8 ± 0.8         |               |               |                    |            |
| L1-logistic        | 0.929 ± 0.012 | 0.000 ± 0.000 | 1.000 ± 0.000                | –             | 0.0 ± 0.0         |               |               |                    |            |
| L2-logistic        | 0.899 ± 0.019 | 0.176 ± 0.101 | 0.953 ± 0.016                | –             | all*              |               |               |                    |            |
| Majority           | 0.929 ± 0.012 | 0.000 ± 0.000 | 1.000 ± 0.000                | –             | –                 |               |               |                    |            |
| Naive Bayes        | 0.675 ± 0.034 | 0.481 ± 0.139 | 0.689 ± 0.038                | 0.173 ± 0.053 | all               |               |               |                    |            |
| PolySVM            | 0.933 ± 0.010 | 0.066 ± 0.053 | 0.999 ± 0.002                | –             | all               |               |               |                    |            |
| CART <sub>b</sub>  | 0.929 ± 0.010 | 0.036 ± 0.049 | 0.997 ± 0.004                | –             | 0.5 ± 0.5         |               |               |                    |            |
| CART <sub>cv</sub> | 0.930 ± 0.012 | 0.104 ± 0.060 | 0.993 ± 0.006                | –             | 1.4 ± 0.7         |               |               |                    |            |
| SCM <sub>b</sub>   | 0.932 ± 0.012 | 0.095 ± 0.047 | 0.995 ± 0.006                | –             | 1.0 ± 0.0         |               |               |                    |            |
| SCM <sub>cv</sub>  | 0.933 ± 0.010 | 0.099 ± 0.052 | 0.996 ± 0.003                | –             | 1.8 ± 0.4         |               |               |                    |            |
| L1-logistic        | 0.974 ± 0.014 | 0.892 ± 0.115 | 0.985 ± 0.015                | 0.883 ± 0.062 | 1686.7 ± 1223.2   |               |               |                    |            |
| L2-logistic        | 0.964 ± 0.018 | 0.824 ± 0.124 | 0.982 ± 0.018                | 0.840 ± 0.082 | all*              |               |               |                    |            |
| Majority           | 0.886 ± 0.025 | 0.000 ± 0.000 | 1.000 ± 0.000                | –             | –                 |               |               |                    |            |
| Naive Bayes        | 0.790 ± 0.074 | 0.802 ± 0.166 | 0.787 ± 0.097                | 0.473 ± 0.074 | all               |               |               |                    |            |
| PolySVM            | 0.915 ± 0.027 | 0.536 ± 0.088 | 0.965 ± 0.022                | 0.593 ± 0.100 | all               |               |               |                    |            |
| CART <sub>b</sub>  | 0.985 ± 0.014 | 0.924 ± 0.106 | 0.992 ± 0.009                | 0.927 ± 0.072 | 2.0 ± 0.0         |               |               |                    |            |
| CART <sub>cv</sub> | 0.985 ± 0.014 | 0.924 ± 0.106 | 0.992 ± 0.009                | 0.927 ± 0.072 | 2.0 ± 0.0         |               |               |                    |            |
| SCM <sub>b</sub>   | 0.985 ± 0.014 | 0.924 ± 0.106 | 0.992 ± 0.009                | 0.927 ± 0.072 | 2.0 ± 0.0         |               |               |                    |            |
| SCM <sub>cv</sub>  | 0.981 ± 0.014 | 0.899 ± 0.115 | 0.992 ± 0.009                | 0.913 ± 0.070 | 2.0 ± 0.0         |               |               |                    |            |
| L1-logistic        | 0.933 ± 0.025 | 0.904 ± 0.060 | 0.949 ± 0.033                | 0.900 ± 0.036 | 14801.2 ± 14384.9 |               |               |                    |            |
| L2-logistic        | 0.911 ± 0.026 | 0.890 ± 0.059 | 0.923 ± 0.037                | 0.870 ± 0.039 | all*              |               |               |                    |            |
| Majority           | 0.662 ± 0.038 | 0.000 ± 0.000 | 1.000 ± 0.000                | –             | –                 |               |               |                    |            |
| Naive Bayes        | 0.711 ± 0.038 | 0.730 ± 0.085 | 0.700 ± 0.050                | 0.627 ± 0.064 | all               |               |               |                    |            |
| PolySVM            | 0.839 ± 0.044 | 0.753 ± 0.120 | 0.885 ± 0.049                | 0.755 ± 0.075 | all               |               |               |                    |            |
| CART <sub>b</sub>  | 0.935 ± 0.021 | 0.880 ± 0.058 | 0.963 ± 0.031                | 0.901 ± 0.033 | 2.0 ± 0.0         |               |               |                    |            |
| CART <sub>cv</sub> | 0.926 ± 0.032 | 0.870 ± 0.072 | 0.955 ± 0.052                | 0.887 ± 0.046 | 2.8 ± 0.9         |               |               |                    |            |
| SCM <sub>b</sub>   | 0.938 ± 0.022 | 0.887 ± 0.061 | 0.963 ± 0.031                | 0.905 ± 0.035 | 2.0 ± 0.0         |               |               |                    |            |
| SCM <sub>cv</sub>  | 0.935 ± 0.024 | 0.887 ± 0.054 | 0.960 ± 0.033                | 0.901 ± 0.039 | 2.8 ± 1.4         |               |               |                    |            |
| L1-logistic        | 1.000 ± 0.000 | 1.000 ± 0.000 | 1.000 ± 0.000                | 1.000 ± 0.000 | 142.0 ± 45.2      |               |               |                    |            |
| L2-logistic        | 1.000 ± 0.000 | 1.000 ± 0.000 | 1.000 ± 0.000                | 1.000 ± 0.000 | all*              |               |               |                    |            |
| Majority           | 0.588 ± 0.112 | 0.000 ± 0.000 | 1.000 ± 0.000                | –             | –                 |               |               |                    |            |
| Naive Bayes        | 0.808 ± 0.110 | 0.589 ± 0.189 | 0.976 ± 0.043                | 0.707 ± 0.159 | all               |               |               |                    |            |
| PolySVM            | 0.996 ± 0.012 | 0.992 ± 0.024 | 1.000 ± 0.000                | 0.996 ± 0.013 | all               |               |               |                    |            |
| <i>E. faecium</i>  | vancomycin    | 134           | 10.3                         |               |                   |               |               |                    |            |

Continued on next page

**Table S1. (Continued)**

| Species              | Antibiotic  | Genomes     | k-mers (millions) | Method             | Accuracy           | Sensitivity | Specificity | F1 score    | Complexity        |
|----------------------|-------------|-------------|-------------------|--------------------|--------------------|-------------|-------------|-------------|-------------------|
| <i>K. pneumoniae</i> | amikacin    | 1893        | 73.2              | CART <sub>b</sub>  | 1.000±0.000        | 1.000±0.000 | 1.000±0.000 | 1.000±0.000 | 1.0 ± 0.0         |
|                      |             |             |                   | CART <sub>cv</sub> | 1.000±0.000        | 1.000±0.000 | 1.000±0.000 | 1.000±0.000 | 1.0 ± 0.0         |
|                      |             |             |                   | SCM <sub>b</sub>   | 1.000±0.000        | 1.000±0.000 | 1.000±0.000 | 1.000±0.000 | 1.0 ± 0.0         |
|                      |             |             |                   | SCM <sub>cv</sub>  | 1.000±0.000        | 1.000±0.000 | 1.000±0.000 | 1.000±0.000 | 1.0 ± 0.0         |
|                      |             |             |                   | L1-logistic        | 0.951±0.010        | 0.740±0.060 | 0.974±0.008 | 0.744±0.038 | 37210.7 ± 42390.4 |
|                      |             |             |                   | L2-logistic        | 0.942±0.010        | 0.694±0.068 | 0.968±0.010 | 0.693±0.051 | all*              |
|                      |             |             |                   | Majority           | 0.904±0.014        | 0.000±0.000 | 1.000±0.000 | –           | –                 |
|                      |             |             |                   | Naive Bayes        | 0.875±0.020        | 0.910±0.046 | 0.872±0.020 | 0.583±0.057 | all               |
|                      |             |             |                   | PolySVM            | 0.958±0.010        | 0.762±0.086 | 0.980±0.006 | 0.776±0.050 | all               |
|                      |             |             |                   | CART <sub>b</sub>  | 0.949±0.011        | 0.673±0.086 | 0.978±0.007 | 0.715±0.061 | 5.2 ± 1.5         |
| CART <sub>cv</sub>   | 0.951±0.015 | 0.699±0.127 | 0.977±0.009       | 0.726±0.096        | 11.1 ± 4.0         |             |             |             |                   |
| SCM <sub>b</sub>     | 0.949±0.015 | 0.643±0.140 | 0.981±0.005       | 0.698±0.120        | 4.2 ± 0.4          |             |             |             |                   |
| SCM <sub>cv</sub>    | 0.952±0.011 | 0.642±0.062 | 0.985±0.008       | 0.720±0.058        | 11.3 ± 5.2         |             |             |             |                   |
| L1-logistic          | 0.921±0.020 | 0.937±0.042 | 0.904±0.059       | 0.926±0.021        | 69783.1 ± 171583.6 |             |             |             |                   |
| L2-logistic          | 0.926±0.037 | 0.953±0.043 | 0.898±0.061       | 0.930±0.038        | all*               |             |             |             |                   |
| Majority             | 0.457±0.067 | 0.600±0.516 | 0.400±0.516       | –                  | –                  |             |             |             |                   |
| Naive Bayes          | 0.653±0.100 | 0.932±0.045 | 0.343±0.174       | 0.740±0.080        | all                |             |             |             |                   |
| PolySVM              | 0.885±0.040 | 0.884±0.068 | 0.894±0.054       | 0.890±0.042        | all                |             |             |             |                   |
| CART <sub>b</sub>    | 0.883±0.046 | 0.904±0.084 | 0.855±0.101       | 0.890±0.050        | 1.8 ± 0.6          |             |             |             |                   |
| CART <sub>cv</sub>   | 0.872±0.040 | 0.883±0.074 | 0.863±0.082       | 0.879±0.043        | 2.2 ± 1.1          |             |             |             |                   |
| SCM <sub>b</sub>     | 0.891±0.039 | 0.929±0.069 | 0.850±0.097       | 0.902±0.029        | 1.9 ± 0.6          |             |             |             |                   |
| SCM <sub>cv</sub>    | 0.872±0.043 | 0.908±0.075 | 0.833±0.101       | 0.883±0.038        | 2.2 ± 0.9          |             |             |             |                   |
| L1-logistic          | 0.982±0.006 | 0.989±0.005 | 0.843±0.116       | 0.990±0.003        | 2168.7 ± 787.6     |             |             |             |                   |
| L2-logistic          | 0.970±0.010 | 0.984±0.006 | 0.709±0.202       | 0.984±0.005        | all*               |             |             |             |                   |
| Majority             | 0.952±0.011 | 1.000±0.000 | 0.000±0.000       | 0.975±0.006        | –                  |             |             |             |                   |
| Naive Bayes          | 0.802±0.019 | 0.794±0.021 | 0.955±0.056       | 0.884±0.012        | all                |             |             |             |                   |
| PolySVM              | 0.974±0.009 | 0.989±0.005 | 0.695±0.128       | 0.986±0.005        | all                |             |             |             |                   |
| CART <sub>b</sub>    | 0.988±0.008 | 0.997±0.004 | 0.810±0.117       | 0.994±0.004        | 3.0 ± 0.0          |             |             |             |                   |
| CART <sub>cv</sub>   | 0.983±0.006 | 0.991±0.007 | 0.824±0.109       | 0.991±0.003        | 4.5 ± 3.3          |             |             |             |                   |
| SCM <sub>b</sub>     | 0.986±0.008 | 0.994±0.006 | 0.829±0.110       | 0.993±0.004        | 3.0 ± 0.5          |             |             |             |                   |
| SCM <sub>cv</sub>    | 0.985±0.008 | 0.993±0.007 | 0.829±0.110       | 0.992±0.004        | 3.3 ± 0.8          |             |             |             |                   |
| L1-logistic          | 0.853±0.021 | 0.908±0.015 | 0.464±0.086       | 0.915±0.013        | 12926.6 ± 2079.5   |             |             |             |                   |
| L2-logistic          | 0.884±0.014 | 0.953±0.016 | 0.394±0.093       | 0.935±0.009        | all*               |             |             |             |                   |
| Majority             | 0.876±0.020 | 1.000±0.000 | 0.000±0.000       | 0.934±0.011        | –                  |             |             |             |                   |
| Naive Bayes          | 0.693±0.029 | 0.692±0.028 | 0.703±0.083       | 0.798±0.020        | all                |             |             |             |                   |
| PolySVM              | 0.904±0.016 | 0.971±0.012 | 0.431±0.065       | 0.947±0.009        | all                |             |             |             |                   |
| CART <sub>b</sub>    | 0.907±0.016 | 0.977±0.016 | 0.407±0.090       | 0.948±0.010        | 5.0 ± 0.7          |             |             |             |                   |
| CART <sub>cv</sub>   | 0.901±0.013 | 0.966±0.014 | 0.434±0.106       | 0.944±0.008        | 7.4 ± 3.3          |             |             |             |                   |
| SCM <sub>b</sub>     | 0.914±0.013 | 0.971±0.007 | 0.510±0.074       | 0.952±0.008        | 6.4 ± 1.4          |             |             |             |                   |
| SCM <sub>cv</sub>    | 0.911±0.011 | 0.980±0.006 | 0.418±0.082       | 0.951±0.007        | 12.4 ± 3.2         |             |             |             |                   |
| L1-logistic          | 0.941±0.014 | 0.967±0.012 | 0.705±0.069       | 0.967±0.008        | 7038.1 ± 5605.9    |             |             |             |                   |
| L2-logistic          | 0.939±0.016 | 0.970±0.013 | 0.667±0.097       | 0.966±0.009        | all*               |             |             |             |                   |
| Majority             | 0.901±0.014 | 1.000±0.000 | 0.000±0.000       | 0.948±0.008        | –                  |             |             |             |                   |
| Naive Bayes          | 0.890±0.026 | 0.908±0.034 | 0.727±0.104       | 0.937±0.017        | all                |             |             |             |                   |
| PolySVM              | 0.967±0.010 | 0.979±0.008 | 0.852±0.043       | 0.982±0.006        | all                |             |             |             |                   |
| CART <sub>b</sub>    | 0.963±0.010 | 0.977±0.008 | 0.846±0.071       | 0.980±0.006        | 5.1 ± 0.6          |             |             |             |                   |
| CART <sub>cv</sub>   | 0.960±0.010 | 0.975±0.008 | 0.831±0.098       | 0.978±0.005        | 8.1 ± 3.4          |             |             |             |                   |
| SCM <sub>b</sub>     | 0.970±0.006 | 0.983±0.008 | 0.853±0.061       | 0.984±0.004        | 6.5 ± 1.0          |             |             |             |                   |
| SCM <sub>cv</sub>    | 0.969±0.005 | 0.983±0.008 | 0.835±0.060       | 0.983±0.003        | 7.1 ± 1.4          |             |             |             |                   |
| L1-logistic          | 0.766±0.017 | 0.778±0.025 | 0.742±0.047       | 0.817±0.015        | 5579.4 ± 9607.8    |             |             |             |                   |
| L2-logistic          | 0.776±0.023 | 0.785±0.032 | 0.758±0.035       | 0.825±0.017        | all*               |             |             |             |                   |
| Majority             | 0.672±0.023 | 1.000±0.000 | 0.000±0.000       | 0.804±0.017        | –                  |             |             |             |                   |
| Naive Bayes          | 0.682±0.031 | 0.653±0.069 | 0.747±0.070       | 0.732±0.035        | all                |             |             |             |                   |
| PolySVM              | 0.788±0.021 | 0.874±0.050 | 0.618±0.102       | 0.847±0.017        | all                |             |             |             |                   |
| CART <sub>b</sub>    | 0.786±0.017 | 0.899±0.046 | 0.561±0.064       | 0.849±0.014        | 6.6 ± 1.8          |             |             |             |                   |
| CART <sub>cv</sub>   | 0.788±0.020 | 0.897±0.056 | 0.569±0.095       | 0.850±0.017        | 9.4 ± 3.8          |             |             |             |                   |
| SCM <sub>b</sub>     | 0.791±0.023 | 0.942±0.026 | 0.483±0.044       | 0.858±0.018        | 3.0 ± 0.5          |             |             |             |                   |
| SCM <sub>cv</sub>    | 0.795±0.020 | 0.952±0.020 | 0.475±0.040       | 0.862±0.015        | 4.7 ± 1.7          |             |             |             |                   |
| L1-logistic          | 0.857±0.017 | 0.825±0.044 | 0.897±0.050       | 0.864±0.019        | 9038.3 ± 10488.3   |             |             |             |                   |
| L2-logistic          | 0.858±0.025 | 0.840±0.030 | 0.880±0.025       | 0.867±0.026        | all*               |             |             |             |                   |
| Majority             | 0.552±0.016 | 1.000±0.000 | 0.000±0.000       | 0.711±0.014        | –                  |             |             |             |                   |
| Naive Bayes          | 0.767±0.026 | 0.810±0.034 | 0.714±0.042       | 0.793±0.024        | all                |             |             |             |                   |
| PolySVM              | 0.866±0.018 | 0.835±0.032 | 0.903±0.023       | 0.872±0.020        | all                |             |             |             |                   |
| CART <sub>b</sub>    | 0.855±0.018 | 0.778±0.030 | 0.949±0.030       | 0.855±0.021        | 5.2 ± 1.5          |             |             |             |                   |
| CART <sub>cv</sub>   | 0.869±0.014 | 0.820±0.026 | 0.929±0.025       | 0.873±0.015        | 20.6 ± 5.7         |             |             |             |                   |
| SCM <sub>b</sub>     | 0.866±0.020 | 0.789±0.029 | 0.961±0.017       | 0.866±0.022        | 6.5 ± 1.2          |             |             |             |                   |
| SCM <sub>cv</sub>    | 0.872±0.017 | 0.819±0.031 | 0.937±0.020       | 0.876±0.020        | 13.5 ± 3.9         |             |             |             |                   |
| L1-logistic          | 0.984±0.009 | 0.991±0.006 | 0.861±0.075       | 0.992±0.005        | 2833.1 ± 2999.7    |             |             |             |                   |
| L2-logistic          | 0.979±0.008 | 0.989±0.007 | 0.804±0.075       | 0.989±0.004        | all*               |             |             |             |                   |
| Majority             | 0.948±0.011 | 1.000±0.000 | 0.000±0.000       | 0.973±0.006        | –                  |             |             |             |                   |
| Naive Bayes          | 0.777±0.021 | 0.766±0.022 | 0.974±0.035       | 0.867±0.015        | all                |             |             |             |                   |
| PolySVM              | 0.970±0.007 | 0.986±0.005 | 0.653±0.114       | 0.984±0.004        | all                |             |             |             |                   |
| CART <sub>b</sub>    | 0.986±0.006 | 0.996±0.003 | 0.788±0.080       | 0.992±0.003        | 1.0 ± 0.0          |             |             |             |                   |

Continued on next page

**Table S1. (Continued)**

| Species            | Antibiotic  | Genomes     | k-mers (millions)  | Method      | Accuracy    | Sensitivity | Specificity | F1 score        | Complexity |
|--------------------|-------------|-------------|--------------------|-------------|-------------|-------------|-------------|-----------------|------------|
| ceftazidime        | 1983        | 65.3        | CART <sub>cv</sub> | 0.986±0.006 | 0.996±0.003 | 0.788±0.080 | 0.992±0.003 | 1.0 ± 0.0       |            |
|                    |             |             | SCM <sub>b</sub>   | 0.984±0.006 | 0.995±0.005 | 0.788±0.080 | 0.992±0.003 | 1.2 ± 0.4       |            |
|                    |             |             | SCM <sub>cv</sub>  | 0.984±0.007 | 0.995±0.006 | 0.788±0.080 | 0.992±0.004 | 2.1 ± 2.2       |            |
|                    |             |             | L1-logistic        | 0.956±0.010 | 0.976±0.005 | 0.690±0.073 | 0.976±0.006 | 7469.9 ± 4105.8 |            |
|                    |             |             | L2-logistic        | 0.956±0.011 | 0.979±0.007 | 0.673±0.126 | 0.977±0.006 | all*            |            |
|                    |             |             | Majority           | 0.930±0.014 | 1.000±0.000 | 0.000±0.000 | 0.963±0.007 | –               |            |
|                    |             |             | Naive Bayes        | 0.776±0.025 | 0.765±0.025 | 0.916±0.060 | 0.863±0.016 | all             |            |
|                    |             |             | PolySVM            | 0.966±0.009 | 0.988±0.005 | 0.675±0.114 | 0.982±0.005 | all             |            |
|                    |             |             | CART <sub>b</sub>  | 0.957±0.008 | 0.988±0.007 | 0.549±0.129 | 0.977±0.004 | 4.2 ± 1.1       |            |
|                    |             |             | CART <sub>cv</sub> | 0.951±0.006 | 0.980±0.013 | 0.554±0.178 | 0.974±0.004 | 7.4 ± 2.6       |            |
|                    |             |             | SCM <sub>b</sub>   | 0.958±0.008 | 0.989±0.008 | 0.549±0.146 | 0.977±0.004 | 4.8 ± 2.1       |            |
|                    |             |             | SCM <sub>cv</sub>  | 0.959±0.014 | 0.984±0.009 | 0.636±0.138 | 0.978±0.008 | 8.2 ± 3.3       |            |
| ceftriaxone        | 1842        | 64.7        | L1-logistic        | 0.972±0.013 | 0.982±0.009 | 0.878±0.079 | 0.984±0.007 | 3401.8 ± 2110.9 |            |
|                    |             |             | L2-logistic        | 0.969±0.011 | 0.982±0.008 | 0.838±0.068 | 0.983±0.006 | all*            |            |
|                    |             |             | Majority           | 0.910±0.016 | 1.000±0.000 | 0.000±0.000 | 0.953±0.009 | –               |            |
|                    |             |             | Naive Bayes        | 0.927±0.005 | 0.941±0.012 | 0.789±0.115 | 0.959±0.003 | all             |            |
|                    |             |             | PolySVM            | 0.978±0.007 | 0.985±0.007 | 0.900±0.033 | 0.988±0.004 | all             |            |
|                    |             |             | CART <sub>b</sub>  | 0.980±0.007 | 0.990±0.006 | 0.881±0.041 | 0.989±0.004 | 4.9 ± 0.7       |            |
|                    |             |             | CART <sub>cv</sub> | 0.978±0.006 | 0.988±0.007 | 0.875±0.042 | 0.988±0.003 | 8.2 ± 2.0       |            |
|                    |             |             | SCM <sub>b</sub>   | 0.982±0.007 | 0.993±0.007 | 0.870±0.049 | 0.990±0.004 | 5.3 ± 0.5       |            |
|                    |             |             | SCM <sub>cv</sub>  | 0.981±0.006 | 0.992±0.008 | 0.872±0.043 | 0.989±0.003 | 6.3 ± 0.8       |            |
|                    |             |             | L1-logistic        | 0.952±0.013 | 0.972±0.010 | 0.846±0.038 | 0.972±0.008 | 6018.8 ± 1859.5 |            |
|                    |             |             | L2-logistic        | 0.951±0.012 | 0.965±0.011 | 0.873±0.054 | 0.971±0.008 | all*            |            |
|                    |             |             | Majority           | 0.846±0.021 | 1.000±0.000 | 0.000±0.000 | 0.916±0.012 | –               |            |
| Naive Bayes        | 0.884±0.009 | 0.872±0.010 | 0.949±0.025        | 0.927±0.006 | all         |             |             |                 |            |
| PolySVM            | 0.960±0.010 | 0.975±0.008 | 0.879±0.036        | 0.977±0.006 | all         |             |             |                 |            |
| CART <sub>b</sub>  | 0.975±0.009 | 0.988±0.006 | 0.906±0.046        | 0.985±0.005 | 5.0 ± 0.9   |             |             |                 |            |
| CART <sub>cv</sub> | 0.972±0.010 | 0.983±0.008 | 0.913±0.046        | 0.983±0.006 | 4.9 ± 1.7   |             |             |                 |            |
| SCM <sub>b</sub>   | 0.974±0.008 | 0.984±0.005 | 0.914±0.038        | 0.984±0.005 | 3.2 ± 0.4   |             |             |                 |            |
| SCM <sub>cv</sub>  | 0.974±0.007 | 0.985±0.005 | 0.916±0.037        | 0.985±0.004 | 3.6 ± 0.8   |             |             |                 |            |
| ertapenem          | 361         | 31.8        | L1-logistic        | 0.965±0.022 | 0.969±0.031 | 0.959±0.054 | 0.978±0.014 | 1748.0 ± 2154.3 |            |
|                    |             |             | L2-logistic        | 0.939±0.013 | 0.946±0.018 | 0.923±0.081 | 0.960±0.009 | all*            |            |
|                    |             |             | Majority           | 0.783±0.032 | 1.000±0.000 | 0.000±0.000 | 0.878±0.020 | –               |            |
|                    |             |             | Naive Bayes        | 0.831±0.041 | 0.825±0.034 | 0.851±0.106 | 0.884±0.028 | all             |            |
|                    |             |             | PolySVM            | 0.956±0.016 | 0.967±0.019 | 0.919±0.071 | 0.972±0.010 | all             |            |
|                    |             |             | CART <sub>b</sub>  | 0.900±0.019 | 0.937±0.031 | 0.777±0.107 | 0.936±0.013 | 2.7 ± 0.8       |            |
|                    |             |             | CART <sub>cv</sub> | 0.924±0.028 | 0.958±0.018 | 0.807±0.130 | 0.952±0.017 | 6.2 ± 1.2       |            |
|                    |             |             | SCM <sub>b</sub>   | 0.906±0.022 | 0.958±0.031 | 0.721±0.072 | 0.941±0.014 | 2.8 ± 0.6       |            |
|                    |             |             | SCM <sub>cv</sub>  | 0.904±0.031 | 0.951±0.044 | 0.740±0.084 | 0.939±0.021 | 4.5 ± 1.3       |            |
|                    |             |             | L1-logistic        | 0.952±0.010 | 0.926±0.019 | 0.971±0.017 | 0.943±0.011 | 7607.4 ± 7145.7 |            |
|                    |             |             | L2-logistic        | 0.948±0.008 | 0.933±0.015 | 0.960±0.011 | 0.939±0.008 | all*            |            |
|                    |             |             | Majority           | 0.571±0.015 | 0.000±0.000 | 1.000±0.000 | –           | –               |            |
| Naive Bayes        | 0.760±0.020 | 0.783±0.027 | 0.743±0.028        | 0.737±0.018 | all         |             |             |                 |            |
| PolySVM            | 0.943±0.006 | 0.922±0.011 | 0.959±0.012        | 0.933±0.008 | all         |             |             |                 |            |
| CART <sub>b</sub>  | 0.949±0.007 | 0.920±0.025 | 0.972±0.011        | 0.940±0.009 | 4.3 ± 1.2   |             |             |                 |            |
| CART <sub>cv</sub> | 0.948±0.008 | 0.931±0.025 | 0.961±0.014        | 0.939±0.009 | 8.8 ± 3.6   |             |             |                 |            |
| SCM <sub>b</sub>   | 0.950±0.007 | 0.924±0.022 | 0.970±0.012        | 0.941±0.009 | 3.9 ± 0.7   |             |             |                 |            |
| SCM <sub>cv</sub>  | 0.953±0.009 | 0.931±0.021 | 0.970±0.017        | 0.945±0.011 | 7.9 ± 2.7   |             |             |                 |            |
| imipenem           | 1891        | 62.2        | L1-logistic        | 0.949±0.009 | 0.920±0.018 | 0.964±0.012 | 0.927±0.012 | 4562.0 ± 8919.4 |            |
|                    |             |             | L2-logistic        | 0.943±0.011 | 0.926±0.021 | 0.953±0.010 | 0.920±0.015 | all*            |            |
|                    |             |             | Majority           | 0.647±0.023 | 0.000±0.000 | 1.000±0.000 | –           | –               |            |
|                    |             |             | Naive Bayes        | 0.771±0.021 | 0.611±0.034 | 0.858±0.019 | 0.652±0.035 | all             |            |
|                    |             |             | PolySVM            | 0.951±0.008 | 0.925±0.015 | 0.964±0.010 | 0.930±0.012 | all             |            |
|                    |             |             | CART <sub>b</sub>  | 0.953±0.008 | 0.933±0.019 | 0.964±0.009 | 0.934±0.010 | 2.3 ± 0.5       |            |
|                    |             |             | CART <sub>cv</sub> | 0.954±0.009 | 0.934±0.020 | 0.966±0.010 | 0.935±0.012 | 3.0 ± 1.1       |            |
|                    |             |             | SCM <sub>b</sub>   | 0.955±0.009 | 0.937±0.014 | 0.964±0.010 | 0.936±0.011 | 2.0 ± 0.0       |            |
|                    |             |             | SCM <sub>cv</sub>  | 0.956±0.009 | 0.939±0.018 | 0.964±0.010 | 0.937±0.011 | 2.6 ± 0.8       |            |
|                    |             |             | L1-logistic        | 0.964±0.007 | 0.962±0.006 | 0.974±0.029 | 0.978±0.004 | 969.6 ± 1700.7  |            |
|                    |             |             | L2-logistic        | 0.955±0.010 | 0.959±0.015 | 0.939±0.038 | 0.972±0.007 | all*            |            |
|                    |             |             | Majority           | 0.807±0.023 | 1.000±0.000 | 0.000±0.000 | 0.893±0.014 | –               |            |
| Naive Bayes        | 0.843±0.029 | 0.808±0.036 | 0.990±0.012        | 0.892±0.023 | all         |             |             |                 |            |
| PolySVM            | 0.960±0.011 | 0.967±0.011 | 0.930±0.035        | 0.975±0.007 | all         |             |             |                 |            |
| CART <sub>b</sub>  | 0.964±0.006 | 0.977±0.008 | 0.908±0.026        | 0.978±0.004 | 3.1 ± 1.0   |             |             |                 |            |
| CART <sub>cv</sub> | 0.965±0.007 | 0.977±0.008 | 0.915±0.037        | 0.978±0.004 | 3.1 ± 1.1   |             |             |                 |            |
| SCM <sub>b</sub>   | 0.963±0.006 | 0.976±0.009 | 0.911±0.031        | 0.977±0.004 | 2.1 ± 0.3   |             |             |                 |            |
| SCM <sub>cv</sub>  | 0.967±0.007 | 0.969±0.009 | 0.957±0.019        | 0.979±0.004 | 3.0 ± 2.9   |             |             |                 |            |
| meropenem          | 2065        | 69.6        | L1-logistic        | 0.953±0.010 | 0.924±0.037 | 0.967±0.006 | 0.928±0.019 | 968.5 ± 67.9    |            |
|                    |             |             | L2-logistic        | 0.949±0.008 | 0.918±0.030 | 0.964±0.010 | 0.922±0.015 | all*            |            |
|                    |             |             | Majority           | 0.671±0.017 | 0.000±0.000 | 1.000±0.000 | –           | –               |            |
|                    |             |             | Naive Bayes        | 0.813±0.036 | 0.704±0.091 | 0.866±0.020 | 0.710±0.070 | all             |            |
|                    |             |             | PolySVM            | 0.953±0.011 | 0.908±0.030 | 0.975±0.009 | 0.926±0.020 | all             |            |
|                    |             |             | CART <sub>b</sub>  | 0.956±0.011 | 0.912±0.030 | 0.978±0.005 | 0.932±0.018 | 3.0 ± 0.0       |            |
|                    |             |             | CART <sub>cv</sub> | 0.957±0.010 | 0.914±0.031 | 0.977±0.006 | 0.932±0.019 | 2.9 ± 0.6       |            |
|                    |             |             | SCM <sub>b</sub>   | 0.957±0.008 | 0.924±0.026 | 0.973±0.006 | 0.934±0.015 | 2.0 ± 0.0       |            |
|                    |             |             | SCM <sub>cv</sub>  | 0.957±0.009 | 0.925±0.026 | 0.973±0.006 | 0.934±0.016 | 2.1 ± 0.3       |            |

Continued on next page



**Table S1. (Continued)**

| Species                       | Antibiotic  | Genomes     | <i>k</i> -mers (millions)   | Method      | Accuracy    | Sensitivity | Specificity | F1 score            | Complexity  |             |                     |
|-------------------------------|-------------|-------------|-----------------------------|-------------|-------------|-------------|-------------|---------------------|-------------|-------------|---------------------|
| nitrofurantoin                | 880         | 40.4        | L1-logistic                 | 0.894±0.010 | 0.940±0.015 | 0.491±0.148 | 0.940±0.006 | 152112.5 ± 285018.2 |             |             |                     |
|                               |             |             | L2-logistic                 | 0.907±0.010 | 0.957±0.013 | 0.482±0.100 | 0.949±0.005 | all*                |             |             |                     |
|                               |             |             | Majority                    | 0.894±0.015 | 1.000±0.000 | 0.000±0.000 | 0.944±0.008 | –                   |             |             |                     |
|                               |             |             | Naive Bayes                 | 0.911±0.013 | 0.969±0.019 | 0.416±0.156 | 0.951±0.008 | all                 |             |             |                     |
|                               |             |             | PolySVM                     | 0.926±0.026 | 0.975±0.015 | 0.512±0.136 | 0.959±0.015 | all                 |             |             |                     |
|                               |             |             | CART <sub>b</sub>           | 0.912±0.025 | 0.965±0.018 | 0.457±0.116 | 0.951±0.015 | 2.8 ± 0.8           |             |             |                     |
|                               |             |             | CART <sub>cv</sub>          | 0.914±0.022 | 0.974±0.014 | 0.405±0.179 | 0.953±0.012 | 2.8 ± 1.5           |             |             |                     |
|                               |             |             | SCM <sub>b</sub>            | 0.911±0.018 | 0.972±0.009 | 0.393±0.128 | 0.951±0.010 | 2.3 ± 0.5           |             |             |                     |
|                               |             |             | SCM <sub>cv</sub>           | 0.911±0.017 | 0.970±0.018 | 0.404±0.135 | 0.951±0.010 | 5.5 ± 4.3           |             |             |                     |
|                               |             |             | ofloxacin                   | 74          | 12.4        | L1-logistic | 0.821±0.069 | 0.856±0.087         | 0.803±0.178 | 0.840±0.081 | 46375.4 ± 143625.1  |
| ofloxacin                     | 74          | 12.4        | L2-logistic                 | 0.793±0.109 | 0.792±0.176 | 0.811±0.199 | 0.801±0.133 | all*                |             |             |                     |
|                               |             |             | Majority                    | 0.600±0.155 | 1.000±0.000 | 0.000±0.000 | 0.739±0.123 | –                   |             |             |                     |
|                               |             |             | Naive Bayes                 | 0.671±0.136 | 0.641±0.201 | 0.778±0.186 | 0.685±0.149 | all                 |             |             |                     |
|                               |             |             | PolySVM                     | 0.807±0.126 | 0.847±0.116 | 0.764±0.208 | 0.827±0.119 | all                 |             |             |                     |
|                               |             |             | CART <sub>b</sub>           | 0.814±0.090 | 0.878±0.107 | 0.760±0.202 | 0.836±0.096 | 1.4 ± 0.5           |             |             |                     |
|                               |             |             | CART <sub>cv</sub>          | 0.786±0.075 | 0.836±0.114 | 0.740±0.171 | 0.814±0.075 | 2.0 ± 0.8           |             |             |                     |
|                               |             |             | SCM <sub>b</sub>            | 0.814±0.090 | 0.878±0.107 | 0.760±0.202 | 0.836±0.096 | 1.4 ± 0.5           |             |             |                     |
|                               |             |             | SCM <sub>cv</sub>           | 0.786±0.101 | 0.848±0.140 | 0.738±0.160 | 0.811±0.107 | 2.3 ± 0.9           |             |             |                     |
|                               |             |             | piperacillin/tazobactam     | 1734        | 63.6        | L1-logistic | 0.862±0.016 | 0.879±0.028         | 0.822±0.061 | 0.897±0.012 | 19247.3 ± 14467.8   |
|                               |             |             | piperacillin/tazobactam     | 1734        | 63.6        | L2-logistic | 0.864±0.011 | 0.884±0.024         | 0.819±0.034 | 0.899±0.009 | all*                |
| Majority                      | 0.688±0.022 | 1.000±0.000 |                             |             |             | 0.000±0.000 | 0.815±0.016 | –                   |             |             |                     |
| Naive Bayes                   | 0.766±0.015 | 0.759±0.015 |                             |             |             | 0.782±0.025 | 0.817±0.014 | all                 |             |             |                     |
| PolySVM                       | 0.886±0.014 | 0.921±0.015 |                             |             |             | 0.807±0.030 | 0.917±0.011 | all                 |             |             |                     |
| CART <sub>b</sub>             | 0.839±0.012 | 0.865±0.025 |                             |             |             | 0.783±0.046 | 0.881±0.011 | 9.8 ± 2.3           |             |             |                     |
| CART <sub>cv</sub>            | 0.842±0.014 | 0.873±0.029 |                             |             |             | 0.775±0.080 | 0.884±0.010 | 19.7 ± 7.7          |             |             |                     |
| SCM <sub>b</sub>              | 0.822±0.019 | 0.876±0.022 |                             |             |             | 0.702±0.047 | 0.871±0.015 | 4.5 ± 1.0           |             |             |                     |
| SCM <sub>cv</sub>             | 0.829±0.009 | 0.817±0.027 |                             |             |             | 0.854±0.067 | 0.868±0.010 | 15.0 ± 4.5          |             |             |                     |
| tetracycline                  | 1553        | 56.5        |                             |             |             | L1-logistic | 0.877±0.019 | 0.798±0.028         | 0.966±0.018 | 0.872±0.022 | 636.6 ± 66.6        |
| tetracycline                  | 1553        | 56.5        |                             |             |             | L2-logistic | 0.852±0.039 | 0.817±0.027         | 0.889±0.081 | 0.854±0.032 | all*                |
|                               |             |             | Majority                    | 0.526±0.013 | 1.000±0.000 | 0.000±0.000 | 0.689±0.011 | –                   |             |             |                     |
|                               |             |             | Naive Bayes                 | 0.670±0.017 | 0.880±0.016 | 0.435±0.048 | 0.737±0.010 | all                 |             |             |                     |
|                               |             |             | PolySVM                     | 0.857±0.019 | 0.818±0.025 | 0.900±0.022 | 0.857±0.019 | all                 |             |             |                     |
|                               |             |             | CART <sub>b</sub>           | 0.872±0.017 | 0.791±0.026 | 0.961±0.026 | 0.866±0.018 | 3.9 ± 0.3           |             |             |                     |
|                               |             |             | CART <sub>cv</sub>          | 0.878±0.013 | 0.795±0.029 | 0.969±0.017 | 0.872±0.016 | 7.2 ± 7.8           |             |             |                     |
|                               |             |             | SCM <sub>b</sub>            | 0.871±0.018 | 0.788±0.026 | 0.963±0.026 | 0.865±0.020 | 4.0 ± 0.0           |             |             |                     |
|                               |             |             | SCM <sub>cv</sub>           | 0.875±0.016 | 0.796±0.029 | 0.962±0.019 | 0.870±0.019 | 8.0 ± 4.1           |             |             |                     |
|                               |             |             | ticarcillin/clavulanic acid | 170         | 26.1        | L1-logistic | 0.953±0.021 | 0.952±0.045         | 0.959±0.039 | 0.948±0.029 | 109218.1 ± 254118.1 |
|                               |             |             | ticarcillin/clavulanic acid | 170         | 26.1        | L2-logistic | 0.965±0.030 | 0.952±0.060         | 0.979±0.027 | 0.961±0.035 | all*                |
| Majority                      | 0.526±0.070 | 0.000±0.000 |                             |             |             | 1.000±0.000 | –           | –                   |             |             |                     |
| Naive Bayes                   | 0.935±0.052 | 0.951±0.053 |                             |             |             | 0.924±0.083 | 0.932±0.054 | all                 |             |             |                     |
| PolySVM                       | 0.962±0.028 | 0.945±0.050 |                             |             |             | 0.979±0.027 | 0.958±0.032 | all                 |             |             |                     |
| CART <sub>b</sub>             | 0.909±0.040 | 0.896±0.086 |                             |             |             | 0.930±0.063 | 0.903±0.041 | 1.0 ± 0.0           |             |             |                     |
| CART <sub>cv</sub>            | 0.921±0.034 | 0.935±0.061 |                             |             |             | 0.912±0.055 | 0.917±0.037 | 2.3 ± 1.3           |             |             |                     |
| SCM <sub>b</sub>              | 0.912±0.039 | 0.907±0.075 |                             |             |             | 0.924±0.058 | 0.907±0.040 | 1.3 ± 0.5           |             |             |                     |
| SCM <sub>cv</sub>             | 0.918±0.033 | 0.917±0.067 |                             |             |             | 0.925±0.049 | 0.912±0.038 | 2.2 ± 0.6           |             |             |                     |
| tobramycin                    | 1693        | 64.4        |                             |             |             | L1-logistic | 0.941±0.011 | 0.931±0.016         | 0.955±0.021 | 0.948±0.010 | 9322.4 ± 7525.6     |
| tobramycin                    | 1693        | 64.4        |                             |             |             | L2-logistic | 0.941±0.013 | 0.926±0.024         | 0.962±0.014 | 0.948±0.013 | all*                |
|                               |             |             | Majority                    | 0.583±0.017 | 1.000±0.000 | 0.000±0.000 | 0.737±0.014 | –                   |             |             |                     |
|                               |             |             | Naive Bayes                 | 0.822±0.022 | 0.755±0.037 | 0.916±0.031 | 0.831±0.020 | all                 |             |             |                     |
|                               |             |             | PolySVM                     | 0.935±0.013 | 0.939±0.015 | 0.930±0.019 | 0.944±0.011 | all                 |             |             |                     |
|                               |             |             | CART <sub>b</sub>           | 0.944±0.009 | 0.943±0.013 | 0.946±0.016 | 0.952±0.008 | 5.8 ± 1.8           |             |             |                     |
|                               |             |             | CART <sub>cv</sub>          | 0.947±0.011 | 0.954±0.016 | 0.938±0.015 | 0.955±0.010 | 11.0 ± 4.3          |             |             |                     |
|                               |             |             | SCM <sub>b</sub>            | 0.938±0.009 | 0.941±0.020 | 0.934±0.013 | 0.947±0.009 | 3.8 ± 0.6           |             |             |                     |
|                               |             |             | SCM <sub>cv</sub>           | 0.940±0.012 | 0.951±0.020 | 0.925±0.020 | 0.949±0.011 | 9.1 ± 2.6           |             |             |                     |
|                               |             |             | trimethoprim                | 188         | 35.1        | L1-logistic | 0.954±0.036 | 0.906±0.090         | 0.990±0.022 | 0.943±0.051 | 156.7 ± 20.9        |
|                               |             |             | trimethoprim                | 188         | 35.1        | L2-logistic | 0.927±0.042 | 0.914±0.061         | 0.938±0.043 | 0.915±0.059 | all*                |
| Majority                      | 0.551±0.061 | 0.000±0.000 |                             |             |             | 1.000±0.000 | –           | –                   |             |             |                     |
| Naive Bayes                   | 0.611±0.120 | 0.918±0.069 |                             |             |             | 0.374±0.192 | 0.681±0.089 | all                 |             |             |                     |
| PolySVM                       | 0.857±0.054 | 0.805±0.089 |                             |             |             | 0.902±0.064 | 0.829±0.085 | all                 |             |             |                     |
| CART <sub>b</sub>             | 0.932±0.034 | 0.879±0.117 |                             |             |             | 0.971±0.034 | 0.914±0.063 | 1.1 ± 0.3           |             |             |                     |
| CART <sub>cv</sub>            | 0.932±0.029 | 0.873±0.096 |                             |             |             | 0.974±0.036 | 0.915±0.049 | 1.6 ± 1.0           |             |             |                     |
| SCM <sub>b</sub>              | 0.938±0.026 | 0.902±0.074 |                             |             |             | 0.967±0.032 | 0.926±0.038 | 1.0 ± 0.0           |             |             |                     |
| SCM <sub>cv</sub>             | 0.932±0.026 | 0.869±0.086 |                             |             |             | 0.979±0.027 | 0.917±0.040 | 1.8 ± 0.8           |             |             |                     |
| trimethoprim/sulfamethoxazole | 2129        | 71.3        |                             |             |             | L1-logistic | 0.935±0.011 | 0.949±0.013         | 0.893±0.018 | 0.956±0.008 | 669.6 ± 86.5        |
| trimethoprim/sulfamethoxazole | 2129        | 71.3        |                             |             |             | L2-logistic | 0.924±0.013 | 0.942±0.018         | 0.871±0.041 | 0.949±0.010 | all*                |
|                               |             |             | Majority                    | 0.752±0.026 | 1.000±0.000 | 0.000±0.000 | 0.858±0.017 | –                   |             |             |                     |
|                               |             |             | Naive Bayes                 | 0.803±0.018 | 0.902±0.019 | 0.504±0.053 | 0.873±0.013 | all                 |             |             |                     |
|                               |             |             | PolySVM                     | 0.933±0.013 | 0.963±0.013 | 0.843±0.031 | 0.955±0.010 | all                 |             |             |                     |
|                               |             |             | CART <sub>b</sub>           | 0.933±0.015 | 0.973±0.012 | 0.813±0.032 | 0.956±0.011 | 3.3 ± 0.5           |             |             |                     |
|                               |             |             | CART <sub>cv</sub>          | 0.932±0.015 | 0.971±0.016 | 0.814±0.034 | 0.955±0.011 | 5.4 ± 2.9           |             |             |                     |
|                               |             |             | SCM <sub>b</sub>            | 0.930±0.015 | 0.958±0.017 | 0.845±0.056 | 0.953±0.011 | 4.0 ± 1.6           |             |             |                     |
|                               |             |             | SCM <sub>cv</sub>           | 0.930±0.012 | 0.952±0.010 | 0.863±0.031 | 0.953±0.009 | 9.3 ± 3.5           |             |             |                     |

Continued on next page

**Table S1.** (Continued)

| Species                | Antibiotic         | Genomes     | <i>k</i> -mers<br>(millions) | Method             | Accuracy    | Sensitivity | Specificity | F1 score    | Complexity        |
|------------------------|--------------------|-------------|------------------------------|--------------------|-------------|-------------|-------------|-------------|-------------------|
| <i>M. tuberculosis</i> | amikacin           | 1145        | 7.6                          | L1-logistic        | 0.951±0.011 | 0.802±0.064 | 0.987±0.010 | 0.862±0.039 | 17781.3 ± 15688.3 |
|                        |                    |             |                              | L2-logistic        | 0.918±0.019 | 0.711±0.064 | 0.970±0.026 | 0.771±0.061 | all*              |
|                        |                    |             |                              | Majority           | 0.803±0.024 | 0.000±0.000 | 1.000±0.000 | -           | -                 |
|                        |                    |             |                              | Naive Bayes        | 0.752±0.042 | 0.668±0.098 | 0.773±0.063 | 0.512±0.063 | all               |
|                        |                    |             |                              | PolySVM            | 0.903±0.021 | 0.613±0.077 | 0.974±0.019 | 0.709±0.074 | all               |
|                        |                    |             |                              | CART <sub>b</sub>  | 0.958±0.009 | 0.808±0.056 | 0.994±0.009 | 0.881±0.035 | 1.0 ± 0.0         |
|                        |                    |             |                              | CART <sub>cv</sub> | 0.958±0.009 | 0.808±0.056 | 0.994±0.009 | 0.881±0.035 | 1.0 ± 0.0         |
|                        |                    |             |                              | SCM <sub>b</sub>   | 0.958±0.009 | 0.808±0.056 | 0.994±0.009 | 0.881±0.035 | 1.0 ± 0.0         |
|                        |                    |             |                              | SCM <sub>cv</sub>  | 0.958±0.009 | 0.808±0.056 | 0.994±0.009 | 0.881±0.035 | 1.0 ± 0.0         |
|                        |                    |             |                              | amoxicillin        | 766         | 7.3         | L1-logistic | 0.981±0.012 | 0.585±0.322       |
|                        | L2-logistic        | 0.974±0.012 | 0.261±0.243                  |                    |             |             | 0.993±0.005 | -           | all*              |
|                        | Majority           | 0.974±0.012 | 0.000±0.000                  |                    |             |             | 1.000±0.000 | -           | -                 |
|                        | Naive Bayes        | 0.962±0.014 | 0.000±0.000                  |                    |             |             | 0.988±0.007 | -           | all               |
|                        | PolySVM            | 0.975±0.014 | 0.212±0.322                  |                    |             |             | 0.996±0.006 | -           | all               |
|                        | CART <sub>b</sub>  | 0.980±0.013 | 0.643±0.370                  |                    |             |             | 0.991±0.006 | -           | 0.9 ± 0.3         |
|                        | CART <sub>cv</sub> | 0.983±0.008 | 0.693±0.301                  |                    |             |             | 0.991±0.006 | -           | 1.1 ± 0.3         |
|                        | SCM <sub>b</sub>   | 0.984±0.007 | 0.718±0.294                  |                    |             |             | 0.991±0.006 | -           | 1.0 ± 0.0         |
|                        | SCM <sub>cv</sub>  | 0.984±0.007 | 0.618±0.352                  |                    |             |             | 0.993±0.006 | -           | 1.4 ± 0.7         |
|                        | capreomycin        | 1123        | 7.7                          |                    |             |             | L1-logistic | 0.932±0.020 | 0.772±0.056       |
|                        |                    |             |                              | L2-logistic        | 0.902±0.022 | 0.640±0.074 | 0.965±0.019 | 0.712±0.057 | all*              |
|                        |                    |             |                              | Majority           | 0.810±0.026 | 0.000±0.000 | 1.000±0.000 | -           | -                 |
|                        |                    |             |                              | Naive Bayes        | 0.783±0.027 | 0.617±0.083 | 0.823±0.023 | 0.517±0.058 | all               |
|                        |                    |             |                              | PolySVM            | 0.889±0.021 | 0.608±0.063 | 0.955±0.014 | 0.674±0.050 | all               |
|                        |                    |             |                              | CART <sub>b</sub>  | 0.938±0.014 | 0.796±0.065 | 0.972±0.011 | 0.829±0.035 | 1.5 ± 0.5         |
|                        |                    |             |                              | CART <sub>cv</sub> | 0.938±0.014 | 0.793±0.075 | 0.972±0.014 | 0.828±0.040 | 1.9 ± 1.0         |
|                        |                    |             |                              | SCM <sub>b</sub>   | 0.938±0.014 | 0.787±0.062 | 0.975±0.010 | 0.829±0.034 | 1.8 ± 0.4         |
|                        |                    |             |                              | SCM <sub>cv</sub>  | 0.937±0.014 | 0.791±0.058 | 0.972±0.010 | 0.826±0.031 | 3.5 ± 3.2         |
|                        |                    |             |                              | ciprofloxacin      | 336         | 5.1         | L1-logistic | 0.973±0.020 | 0.902±0.132       |
|                        | L2-logistic        | 0.940±0.031 | 0.650±0.194                  |                    |             |             | 0.968±0.022 | 0.631±0.157 | all*              |
|                        | Majority           | 0.921±0.022 | 0.000±0.000                  |                    |             |             | 1.000±0.000 | -           | -                 |
|                        | Naive Bayes        | 0.912±0.022 | 0.039±0.087                  |                    |             |             | 0.987±0.010 | -           | all               |
|                        | PolySVM            | 0.951±0.027 | 0.675±0.208                  |                    |             |             | 0.977±0.020 | 0.684±0.160 | all               |
|                        | CART <sub>b</sub>  | 0.982±0.009 | 0.935±0.106                  |                    |             |             | 0.985±0.009 | 0.888±0.065 | 1.1 ± 0.3         |
|                        | CART <sub>cv</sub> | 0.984±0.011 | 0.918±0.107                  |                    |             |             | 0.989±0.011 | 0.901±0.072 | 1.9 ± 0.9         |
|                        | SCM <sub>b</sub>   | 0.982±0.009 | 0.918±0.107                  |                    |             |             | 0.987±0.010 | 0.886±0.064 | 1.3 ± 0.5         |
|                        | SCM <sub>cv</sub>  | 0.981±0.010 | 0.885±0.129                  |                    |             |             | 0.987±0.010 | 0.867±0.095 | 1.5 ± 0.5         |
|                        | cycloserine        | 336         | 4.8                          |                    |             |             | L1-logistic | 0.842±0.028 | 0.618±0.109       |
|                        |                    |             |                              | L2-logistic        | 0.839±0.034 | 0.461±0.188 | 0.919±0.043 | 0.491±0.172 | all*              |
|                        |                    |             |                              | Majority           | 0.815±0.045 | 0.000±0.000 | 1.000±0.000 | -           | -                 |
|                        |                    |             |                              | Naive Bayes        | 0.813±0.047 | 0.005±0.017 | 0.996±0.009 | -           | all               |
|                        |                    |             |                              | PolySVM            | 0.828±0.030 | 0.527±0.094 | 0.898±0.041 | 0.525±0.092 | all               |
|                        |                    |             |                              | CART <sub>b</sub>  | 0.812±0.043 | 0.020±0.063 | 0.993±0.022 | -           | 0.3 ± 0.9         |
|                        |                    |             |                              | CART <sub>cv</sub> | 0.830±0.043 | 0.418±0.130 | 0.922±0.058 | 0.468±0.150 | 12.7 ± 9.5        |
|                        |                    |             |                              | SCM <sub>b</sub>   | 0.800±0.039 | 0.137±0.083 | 0.953±0.043 | 0.190±0.083 | 1.5 ± 0.5         |
|                        |                    |             |                              | SCM <sub>cv</sub>  | 0.822±0.040 | 0.302±0.152 | 0.942±0.056 | 0.365±0.104 | 6.5 ± 5.4         |
|                        |                    |             |                              | ethambutol         | 4780        | 11.6        | L1-logistic | 0.924±0.007 | 0.760±0.059       |
|                        | L2-logistic        | 0.924±0.010 | 0.773±0.070                  |                    |             |             | 0.952±0.013 | 0.762±0.033 | all*              |
|                        | Majority           | 0.841±0.006 | 0.000±0.000                  |                    |             |             | 1.000±0.000 | -           | -                 |
|                        | Naive Bayes        | 0.823±0.013 | 0.769±0.053                  |                    |             |             | 0.833±0.010 | 0.579±0.035 | all               |
|                        | PolySVM            | 0.925±0.011 | 0.722±0.055                  |                    |             |             | 0.963±0.005 | 0.752±0.041 | all               |
|                        | CART <sub>b</sub>  | 0.926±0.010 | 0.764±0.053                  |                    |             |             | 0.956±0.007 | 0.765±0.036 | 13.2 ± 2.1        |
|                        | CART <sub>cv</sub> | 0.924±0.012 | 0.774±0.067                  |                    |             |             | 0.952±0.008 | 0.762±0.045 | 20.7 ± 8.0        |
|                        | SCM <sub>b</sub>   | 0.920±0.006 | 0.743±0.056                  |                    |             |             | 0.953±0.013 | 0.745±0.020 | 5.7 ± 1.2         |
|                        | SCM <sub>cv</sub>  | 0.923±0.007 | 0.766±0.040                  |                    |             |             | 0.952±0.011 | 0.758±0.018 | 10.2 ± 2.3        |
|                        | ethionamide        | 564         | 5.0                          |                    |             |             | L1-logistic | 0.781±0.043 | 0.695±0.058       |
|                        |                    |             |                              | L2-logistic        | 0.739±0.047 | 0.726±0.079 | 0.746±0.104 | 0.681±0.043 | all*              |
|                        |                    |             |                              | Majority           | 0.616±0.032 | 0.000±0.000 | 1.000±0.000 | -           | -                 |
|                        |                    |             |                              | Naive Bayes        | 0.688±0.060 | 0.570±0.115 | 0.762±0.134 | 0.581±0.062 | all               |
|                        |                    |             |                              | PolySVM            | 0.779±0.028 | 0.623±0.057 | 0.875±0.031 | 0.682±0.042 | all               |
|                        |                    |             |                              | CART <sub>b</sub>  | 0.781±0.024 | 0.616±0.062 | 0.884±0.035 | 0.682±0.042 | 2.5 ± 0.5         |
|                        |                    |             |                              | CART <sub>cv</sub> | 0.782±0.046 | 0.674±0.078 | 0.849±0.069 | 0.703±0.062 | 25.3 ± 14.0       |
|                        |                    |             |                              | SCM <sub>b</sub>   | 0.771±0.026 | 0.605±0.090 | 0.876±0.072 | 0.667±0.043 | 2.2 ± 0.4         |
|                        |                    |             |                              | SCM <sub>cv</sub>  | 0.762±0.032 | 0.601±0.092 | 0.863±0.091 | 0.658±0.042 | 5.0 ± 1.9         |
|                        |                    |             |                              | isoniazid          | 5022        | 11.7        | L1-logistic | 0.962±0.004 | 0.921±0.012       |
|                        | L2-logistic        | 0.941±0.005 | 0.865±0.016                  |                    |             |             | 0.981±0.006 | 0.910±0.007 | all*              |
|                        | Majority           | 0.658±0.011 | 0.000±0.000                  |                    |             |             | 1.000±0.000 | -           | -                 |
|                        | Naive Bayes        | 0.789±0.011 | 0.697±0.033                  |                    |             |             | 0.837±0.010 | 0.693±0.024 | all               |
|                        | PolySVM            | 0.934±0.007 | 0.845±0.019                  |                    |             |             | 0.980±0.005 | 0.897±0.011 | all               |
|                        | CART <sub>b</sub>  | 0.962±0.004 | 0.935±0.011                  |                    |             |             | 0.976±0.008 | 0.944±0.005 | 4.7 ± 1.2         |
|                        | CART <sub>cv</sub> | 0.963±0.004 | 0.943±0.010                  |                    |             |             | 0.973±0.007 | 0.945±0.006 | 5.9 ± 2.6         |
|                        | SCM <sub>b</sub>   | 0.963±0.005 | 0.936±0.016                  |                    |             |             | 0.977±0.009 | 0.945±0.007 | 4.5 ± 0.5         |
|                        | SCM <sub>cv</sub>  | 0.963±0.004 | 0.941±0.013                  |                    |             |             | 0.975±0.008 | 0.946±0.006 | 5.0 ± 1.7         |
|                        | kanamycin          | 1355        | 7.6                          |                    |             |             | L1-logistic | 0.947±0.010 | 0.842±0.037       |
|                        |                    |             |                              | L2-logistic        | 0.895±0.029 | 0.774±0.060 | 0.929±0.050 | 0.766±0.040 | all*              |
|                        |                    |             |                              | Majority           | 0.781±0.012 | 0.000±0.000 | 1.000±0.000 | -           | -                 |

Continued on next page

**Table S1. (Continued)**

| Species                  | Antibiotic    | Genomes       | k-mers (millions)  | Method        | Accuracy      | Sensitivity   | Specificity   | F1 score          | Complexity |
|--------------------------|---------------|---------------|--------------------|---------------|---------------|---------------|---------------|-------------------|------------|
| moxifloxacin             | 699           | 7.2           | Naive Bayes        | 0.764 ± 0.022 | 0.773 ± 0.027 | 0.762 ± 0.025 | 0.590 ± 0.033 | all               |            |
|                          |               |               | PolySVM            | 0.907 ± 0.010 | 0.714 ± 0.033 | 0.961 ± 0.012 | 0.770 ± 0.023 | all               |            |
|                          |               |               | CART <sub>b</sub>  | 0.957 ± 0.011 | 0.844 ± 0.040 | 0.989 ± 0.006 | 0.895 ± 0.025 | 3.0 ± 0.0         |            |
|                          |               |               | CART <sub>cv</sub> | 0.957 ± 0.011 | 0.844 ± 0.040 | 0.989 ± 0.006 | 0.895 ± 0.025 | 3.0 ± 0.0         |            |
|                          |               |               | SCM <sub>b</sub>   | 0.949 ± 0.012 | 0.844 ± 0.040 | 0.979 ± 0.008 | 0.880 ± 0.028 | 2.0 ± 0.0         |            |
|                          |               |               | SCM <sub>cv</sub>  | 0.949 ± 0.013 | 0.845 ± 0.038 | 0.978 ± 0.010 | 0.879 ± 0.029 | 2.1 ± 0.3         |            |
|                          |               |               | L1-logistic        | 0.953 ± 0.017 | 0.722 ± 0.123 | 0.976 ± 0.017 | 0.729 ± 0.097 | 6834.6 ± 7712.5   |            |
|                          |               |               | L2-logistic        | 0.933 ± 0.021 | 0.457 ± 0.131 | 0.980 ± 0.013 | 0.543 ± 0.143 | all*              |            |
|                          |               |               | Majority           | 0.911 ± 0.018 | 0.000 ± 0.000 | 1.000 ± 0.000 | –             | –                 |            |
|                          |               |               | Naive Bayes        | 0.883 ± 0.025 | 0.110 ± 0.107 | 0.961 ± 0.024 | –             | all               |            |
|                          |               |               | PolySVM            | 0.924 ± 0.012 | 0.231 ± 0.145 | 0.990 ± 0.009 | –             | all               |            |
|                          |               |               | CART <sub>b</sub>  | 0.957 ± 0.020 | 0.844 ± 0.162 | 0.968 ± 0.014 | 0.769 ± 0.117 | 1.1 ± 0.3         |            |
|                          |               |               | CART <sub>cv</sub> | 0.960 ± 0.014 | 0.860 ± 0.149 | 0.969 ± 0.015 | 0.782 ± 0.099 | 1.1 ± 0.3         |            |
|                          |               |               | SCM <sub>b</sub>   | 0.950 ± 0.017 | 0.771 ± 0.185 | 0.969 ± 0.014 | 0.828 ± 0.109 | 1.4 ± 0.5         |            |
| SCM <sub>cv</sub>        | 0.960 ± 0.014 | 0.854 ± 0.118 | 0.970 ± 0.016      | 0.785 ± 0.075 | 1.4 ± 1.3     |               |               |                   |            |
| nicotinamide             | 167           | 4.6           | L1-logistic        | 0.803 ± 0.098 | 0.724 ± 0.119 | 0.888 ± 0.123 | 0.791 ± 0.095 | 17764.3 ± 54250.8 |            |
|                          |               |               | L2-logistic        | 0.730 ± 0.097 | 0.671 ± 0.079 | 0.782 ± 0.155 | 0.725 ± 0.076 | all*              |            |
|                          |               |               | Majority           | 0.433 ± 0.038 | 0.400 ± 0.516 | 0.600 ± 0.516 | –             | –                 |            |
|                          |               |               | Naive Bayes        | 0.618 ± 0.128 | 0.455 ± 0.271 | 0.826 ± 0.153 | –             | all               |            |
|                          |               |               | PolySVM            | 0.752 ± 0.114 | 0.783 ± 0.131 | 0.715 ± 0.140 | 0.767 ± 0.096 | all               |            |
|                          |               |               | CART <sub>b</sub>  | 0.842 ± 0.057 | 0.746 ± 0.090 | 0.952 ± 0.045 | 0.828 ± 0.066 | 1.0 ± 0.0         |            |
|                          |               |               | CART <sub>cv</sub> | 0.836 ± 0.063 | 0.746 ± 0.090 | 0.939 ± 0.058 | 0.823 ± 0.069 | 1.3 ± 0.7         |            |
|                          |               |               | SCM <sub>b</sub>   | 0.842 ± 0.057 | 0.746 ± 0.090 | 0.952 ± 0.045 | 0.828 ± 0.066 | 1.0 ± 0.0         |            |
|                          |               |               | SCM <sub>cv</sub>  | 0.821 ± 0.063 | 0.734 ± 0.099 | 0.919 ± 0.082 | 0.807 ± 0.070 | 2.0 ± 1.2         |            |
|                          |               |               | L1-logistic        | 0.935 ± 0.017 | 0.888 ± 0.019 | 0.963 ± 0.025 | 0.912 ± 0.018 | 193.9 ± 24.5      |            |
|                          |               |               | L2-logistic        | 0.828 ± 0.029 | 0.802 ± 0.055 | 0.844 ± 0.037 | 0.776 ± 0.029 | all*              |            |
|                          |               |               | Majority           | 0.628 ± 0.031 | 0.000 ± 0.000 | 1.000 ± 0.000 | –             | –                 |            |
|                          |               |               | Naive Bayes        | 0.672 ± 0.031 | 0.275 ± 0.155 | 0.907 ± 0.067 | 0.357 ± 0.166 | all               |            |
|                          |               |               | PolySVM            | 0.848 ± 0.026 | 0.791 ± 0.046 | 0.883 ± 0.027 | 0.795 ± 0.033 | all               |            |
| CART <sub>b</sub>        | 0.938 ± 0.019 | 0.895 ± 0.020 | 0.964 ± 0.026      | 0.916 ± 0.021 | 1.0 ± 0.0     |               |               |                   |            |
| CART <sub>cv</sub>       | 0.938 ± 0.019 | 0.895 ± 0.020 | 0.964 ± 0.026      | 0.916 ± 0.021 | 1.0 ± 0.0     |               |               |                   |            |
| SCM <sub>b</sub>         | 0.938 ± 0.019 | 0.895 ± 0.020 | 0.964 ± 0.026      | 0.916 ± 0.021 | 1.0 ± 0.0     |               |               |                   |            |
| SCM <sub>cv</sub>        | 0.937 ± 0.018 | 0.895 ± 0.020 | 0.962 ± 0.026      | 0.914 ± 0.020 | 1.4 ± 0.8     |               |               |                   |            |
| para-aminosalicylic acid | 378           | 4.9           | L1-logistic        | 0.883 ± 0.055 | 0.720 ± 0.108 | 0.925 ± 0.051 | 0.712 ± 0.127 | 2944.3 ± 3479.3   |            |
|                          |               |               | L2-logistic        | 0.843 ± 0.040 | 0.789 ± 0.113 | 0.856 ± 0.065 | 0.666 ± 0.070 | all*              |            |
|                          |               |               | Majority           | 0.797 ± 0.047 | 0.000 ± 0.000 | 1.000 ± 0.000 | –             | –                 |            |
|                          |               |               | Naive Bayes        | 0.856 ± 0.031 | 0.562 ± 0.096 | 0.932 ± 0.031 | 0.607 ± 0.085 | all               |            |
|                          |               |               | PolySVM            | 0.845 ± 0.033 | 0.468 ± 0.109 | 0.942 ± 0.044 | 0.543 ± 0.083 | all               |            |
|                          |               |               | CART <sub>b</sub>  | 0.835 ± 0.029 | 0.362 ± 0.101 | 0.957 ± 0.033 | 0.459 ± 0.090 | 1.0 ± 0.0         |            |
|                          |               |               | CART <sub>cv</sub> | 0.823 ± 0.028 | 0.454 ± 0.116 | 0.918 ± 0.032 | 0.499 ± 0.063 | 10.3 ± 9.2        |            |
|                          |               |               | SCM <sub>b</sub>   | 0.836 ± 0.037 | 0.402 ± 0.127 | 0.948 ± 0.041 | 0.487 ± 0.110 | 1.1 ± 0.3         |            |
|                          |               |               | SCM <sub>cv</sub>  | 0.825 ± 0.035 | 0.418 ± 0.192 | 0.935 ± 0.063 | 0.469 ± 0.115 | 3.0 ± 2.7         |            |
|                          |               |               | L1-logistic        | 0.944 ± 0.009 | 0.696 ± 0.064 | 0.971 ± 0.007 | 0.707 ± 0.043 | 63589.6 ± 18666.8 |            |
|                          |               |               | L2-logistic        | 0.938 ± 0.008 | 0.695 ± 0.069 | 0.965 ± 0.005 | 0.685 ± 0.036 | all*              |            |
|                          |               |               | Majority           | 0.903 ± 0.009 | 0.000 ± 0.000 | 1.000 ± 0.000 | –             | –                 |            |
|                          |               |               | Naive Bayes        | 0.842 ± 0.016 | 0.673 ± 0.070 | 0.860 ± 0.017 | 0.451 ± 0.039 | all               |            |
|                          |               |               | PolySVM            | 0.942 ± 0.008 | 0.665 ± 0.062 | 0.972 ± 0.005 | 0.689 ± 0.036 | all               |            |
| CART <sub>b</sub>        | 0.942 ± 0.012 | 0.609 ± 0.067 | 0.978 ± 0.008      | 0.671 ± 0.054 | 11.3 ± 2.0    |               |               |                   |            |
| CART <sub>cv</sub>       | 0.945 ± 0.009 | 0.584 ± 0.060 | 0.984 ± 0.009      | 0.671 ± 0.038 | 17.4 ± 9.4    |               |               |                   |            |
| SCM <sub>b</sub>         | 0.943 ± 0.008 | 0.571 ± 0.056 | 0.983 ± 0.006      | 0.657 ± 0.038 | 7.6 ± 1.6     |               |               |                   |            |
| SCM <sub>cv</sub>        | 0.941 ± 0.010 | 0.613 ± 0.046 | 0.977 ± 0.009      | 0.669 ± 0.038 | 13.4 ± 4.0    |               |               |                   |            |
| rifabutin                | 161           | 4.7           | L1-logistic        | 0.828 ± 0.045 | 0.795 ± 0.073 | 0.848 ± 0.094 | 0.814 ± 0.041 | 47.9 ± 11.6       |            |
|                          |               |               | L2-logistic        | 0.619 ± 0.062 | 0.621 ± 0.191 | 0.616 ± 0.123 | 0.593 ± 0.125 | all*              |            |
|                          |               |               | Majority           | 0.522 ± 0.078 | 0.000 ± 0.000 | 1.000 ± 0.000 | –             | –                 |            |
|                          |               |               | Naive Bayes        | 0.575 ± 0.082 | 0.584 ± 0.148 | 0.574 ± 0.096 | 0.559 ± 0.111 | all               |            |
|                          |               |               | PolySVM            | 0.641 ± 0.068 | 0.589 ± 0.114 | 0.690 ± 0.064 | 0.605 ± 0.082 | all               |            |
|                          |               |               | CART <sub>b</sub>  | 0.834 ± 0.047 | 0.819 ± 0.071 | 0.835 ± 0.085 | 0.824 ± 0.047 | 1.0 ± 0.0         |            |
|                          |               |               | CART <sub>cv</sub> | 0.828 ± 0.054 | 0.813 ± 0.067 | 0.829 ± 0.088 | 0.818 ± 0.052 | 1.7 ± 1.6         |            |
|                          |               |               | SCM <sub>b</sub>   | 0.834 ± 0.047 | 0.819 ± 0.071 | 0.835 ± 0.085 | 0.824 ± 0.047 | 1.0 ± 0.0         |            |
|                          |               |               | SCM <sub>cv</sub>  | 0.825 ± 0.040 | 0.811 ± 0.054 | 0.822 ± 0.095 | 0.815 ± 0.035 | 1.5 ± 0.7         |            |
|                          |               |               | L1-logistic        | 0.974 ± 0.005 | 0.962 ± 0.013 | 0.979 ± 0.005 | 0.954 ± 0.009 | 1376.3 ± 164.7    |            |
|                          |               |               | L2-logistic        | 0.958 ± 0.008 | 0.902 ± 0.014 | 0.979 ± 0.007 | 0.922 ± 0.014 | all*              |            |
|                          |               |               | Majority           | 0.724 ± 0.011 | 0.000 ± 0.000 | 1.000 ± 0.000 | –             | –                 |            |
|                          |               |               | Naive Bayes        | 0.828 ± 0.011 | 0.821 ± 0.026 | 0.831 ± 0.011 | 0.725 ± 0.021 | all               |            |
|                          |               |               | PolySVM            | 0.950 ± 0.007 | 0.883 ± 0.014 | 0.976 ± 0.006 | 0.907 ± 0.013 | all               |            |
| CART <sub>b</sub>        | 0.977 ± 0.005 | 0.963 ± 0.014 | 0.982 ± 0.005      | 0.958 ± 0.009 | 4.0 ± 0.9     |               |               |                   |            |
| CART <sub>cv</sub>       | 0.978 ± 0.005 | 0.966 ± 0.014 | 0.982 ± 0.006      | 0.960 ± 0.008 | 4.6 ± 1.1     |               |               |                   |            |
| SCM <sub>b</sub>         | 0.977 ± 0.005 | 0.963 ± 0.014 | 0.982 ± 0.005      | 0.958 ± 0.009 | 3.4 ± 0.5     |               |               |                   |            |
| SCM <sub>cv</sub>        | 0.977 ± 0.005 | 0.966 ± 0.013 | 0.982 ± 0.006      | 0.960 ± 0.008 | 4.2 ± 1.0     |               |               |                   |            |
| streptomycin             | 3406          | 9.9           | L1-logistic        | 0.907 ± 0.004 | 0.865 ± 0.015 | 0.926 ± 0.007 | 0.854 ± 0.007 | 1926.9 ± 130.3    |            |
|                          |               |               | L2-logistic        | 0.895 ± 0.008 | 0.817 ± 0.017 | 0.931 ± 0.009 | 0.830 ± 0.015 | all*              |            |
|                          |               |               | Majority           | 0.687 ± 0.009 | 0.000 ± 0.000 | 1.000 ± 0.000 | –             | –                 |            |
|                          |               |               | Naive Bayes        | 0.761 ± 0.020 | 0.713 ± 0.030 | 0.783 ± 0.025 | 0.652 ± 0.026 | all               |            |
|                          |               |               | PolySVM            | 0.896 ± 0.008 | 0.797 ± 0.025 | 0.941 ± 0.010 | 0.827 ± 0.016 | all               |            |

Continued on next page

**Table S1. (Continued)**

| Species               | Antibiotic        | Genomes     | k-mers (millions)    | Method             | Accuracy    | Sensitivity | Specificity | F1 score    | Complexity       |             |                   |                   |
|-----------------------|-------------------|-------------|----------------------|--------------------|-------------|-------------|-------------|-------------|------------------|-------------|-------------------|-------------------|
| <i>N. gonorrhoeae</i> | azithromycin      | 392         | 4.8                  | CART <sub>b</sub>  | 0.910±0.006 | 0.805±0.027 | 0.958±0.011 | 0.848±0.011 | 10.0 ± 1.4       |             |                   |                   |
|                       |                   |             |                      | CART <sub>cv</sub> | 0.907±0.006 | 0.807±0.032 | 0.953±0.014 | 0.845±0.012 | 17.5 ± 11.8      |             |                   |                   |
|                       |                   |             |                      | SCM <sub>b</sub>   | 0.906±0.010 | 0.783±0.037 | 0.961±0.012 | 0.838±0.019 | 6.8 ± 0.9        |             |                   |                   |
|                       |                   |             |                      | SCM <sub>cv</sub>  | 0.908±0.011 | 0.777±0.029 | 0.968±0.009 | 0.841±0.021 | 11.2 ± 3.5       |             |                   |                   |
|                       |                   |             |                      | L1-logistic        | 0.942±0.024 | 0.939±0.036 | 0.945±0.039 | 0.945±0.025 | 6095.6 ± 9342.0  |             |                   |                   |
|                       |                   |             |                      | L2-logistic        | 0.915±0.031 | 0.903±0.048 | 0.928±0.032 | 0.918±0.030 | all*             |             |                   |                   |
|                       |                   |             |                      | Majority           | 0.529±0.035 | 1.000±0.000 | 0.000±0.000 | 0.692±0.030 | –                |             |                   |                   |
|                       |                   |             |                      | Naive Bayes        | 0.736±0.055 | 0.596±0.086 | 0.894±0.045 | 0.702±0.072 | all              |             |                   |                   |
|                       |                   |             |                      | PolySVM            | 0.906±0.038 | 0.902±0.057 | 0.910±0.046 | 0.909±0.038 | all              |             |                   |                   |
|                       |                   |             |                      | CART <sub>b</sub>  | 0.936±0.039 | 0.969±0.028 | 0.899±0.057 | 0.942±0.035 | 3.3 ± 0.5        |             |                   |                   |
|                       |                   |             |                      | CART <sub>cv</sub> | 0.929±0.031 | 0.962±0.030 | 0.894±0.047 | 0.935±0.028 | 6.1 ± 3.8        |             |                   |                   |
|                       |                   |             |                      | SCM <sub>b</sub>   | 0.935±0.030 | 0.974±0.023 | 0.891±0.047 | 0.941±0.026 | 3.0 ± 0.0        |             |                   |                   |
|                       | SCM <sub>cv</sub> | 0.935±0.033 | 0.972±0.024          | 0.894±0.048        | 0.940±0.029 | 3.5 ± 0.8   |             |             |                  |             |                   |                   |
|                       | ciprofloxacin     | 173         | 3.0                  | L1-logistic        | 0.971±0.024 | 0.974±0.037 | 0.967±0.060 | 0.977±0.018 | 9440.5 ± 24435.6 |             |                   |                   |
|                       |                   |             |                      | L2-logistic        | 0.968±0.017 | 0.950±0.024 | 1.000±0.000 | 0.974±0.013 | all*             |             |                   |                   |
|                       |                   |             |                      | Majority           | 0.638±0.048 | 1.000±0.000 | 0.000±0.000 | 0.778±0.036 | –                |             |                   |                   |
|                       |                   |             |                      | Naive Bayes        | 0.935±0.053 | 0.899±0.086 | 1.000±0.000 | 0.945±0.049 | all              |             |                   |                   |
|                       |                   |             |                      | PolySVM            | 0.971±0.020 | 0.955±0.029 | 1.000±0.000 | 0.977±0.015 | all              |             |                   |                   |
|                       |                   |             |                      | CART <sub>b</sub>  | 0.971±0.031 | 0.991±0.029 | 0.935±0.065 | 0.977±0.024 | 1.0 ± 0.0        |             |                   |                   |
|                       |                   |             |                      | CART <sub>cv</sub> | 0.956±0.040 | 0.977±0.038 | 0.917±0.070 | 0.966±0.030 | 1.1 ± 0.3        |             |                   |                   |
|                       |                   |             |                      | SCM <sub>b</sub>   | 0.971±0.031 | 0.991±0.029 | 0.935±0.065 | 0.977±0.024 | 1.0 ± 0.0        |             |                   |                   |
|                       |                   |             |                      | SCM <sub>cv</sub>  | 0.965±0.030 | 0.982±0.032 | 0.935±0.065 | 0.973±0.024 | 1.1 ± 0.3        |             |                   |                   |
|                       |                   |             |                      | erythromycin       | 178         | 3.0         | L1-logistic | 0.869±0.041 | 0.887±0.064      | 0.838±0.082 | 0.882±0.041       | 130.7 ± 13.7      |
|                       |                   |             |                      |                    |             |             | L2-logistic | 0.849±0.036 | 0.866±0.071      | 0.818±0.074 | 0.864±0.039       | all*              |
| Majority              |                   |             |                      |                    |             |             | 0.566±0.061 | 1.000±0.000 | 0.000±0.000      | 0.721±0.051 | –                 |                   |
| Naive Bayes           | 0.843±0.078       | 0.831±0.116 | 0.846±0.076          |                    |             |             | 0.850±0.086 | all         |                  |             |                   |                   |
| PolySVM               | 0.869±0.047       | 0.902±0.064 | 0.818±0.097          |                    |             |             | 0.885±0.041 | all         |                  |             |                   |                   |
| CART <sub>b</sub>     | 0.883±0.041       | 0.919±0.047 | 0.831±0.075          |                    |             |             | 0.898±0.034 | 1.0 ± 0.0   |                  |             |                   |                   |
| CART <sub>cv</sub>    | 0.886±0.038       | 0.925±0.047 | 0.831±0.075          |                    |             |             | 0.901±0.030 | 1.0 ± 0.0   |                  |             |                   |                   |
| SCM <sub>b</sub>      | 0.889±0.044       | 0.925±0.047 | 0.838±0.082          |                    |             |             | 0.904±0.035 | 1.0 ± 0.0   |                  |             |                   |                   |
| SCM <sub>cv</sub>     | 0.874±0.049       | 0.908±0.055 | 0.825±0.079          |                    |             |             | 0.889±0.045 | 1.2 ± 0.6   |                  |             |                   |                   |
| tetracycline          | 142               | 2.9         | L1-logistic          |                    |             |             | 0.929±0.038 | 0.972±0.048 | 0.758±0.180      | 0.954±0.026 | 40683.8 ± 76894.8 |                   |
|                       |                   |             | L2-logistic          |                    |             |             | 0.904±0.058 | 0.929±0.065 | 0.801±0.170      | 0.938±0.036 | all*              |                   |
|                       |                   |             | Majority             |                    |             |             | 0.775±0.073 | 1.000±0.000 | 0.000±0.000      | 0.872±0.047 | –                 |                   |
|                       |                   |             | Naive Bayes          | 0.896±0.064        | 0.920±0.058 | 0.801±0.170 | 0.933±0.039 | all         |                  |             |                   |                   |
|                       |                   |             | PolySVM              | 0.950±0.038        | 0.996±0.013 | 0.770±0.177 | 0.969±0.023 | all         |                  |             |                   |                   |
|                       |                   |             | CART <sub>b</sub>    | 0.918±0.053        | 0.966±0.044 | 0.747±0.190 | 0.949±0.033 | 1.0 ± 0.0   |                  |             |                   |                   |
|                       |                   |             | CART <sub>cv</sub>   | 0.896±0.043        | 0.940±0.074 | 0.736±0.184 | 0.932±0.034 | 1.5 ± 0.8   |                  |             |                   |                   |
|                       |                   |             | SCM <sub>b</sub>     | 0.896±0.059        | 0.942±0.072 | 0.735±0.175 | 0.933±0.040 | 1.0 ± 0.0   |                  |             |                   |                   |
|                       |                   |             | SCM <sub>cv</sub>    | 0.907±0.042        | 0.950±0.062 | 0.747±0.190 | 0.940±0.029 | 1.3 ± 0.5   |                  |             |                   |                   |
|                       |                   |             | <i>P. aeruginosa</i> | amikacin           | 498         | 43.2        | L1-logistic | 0.879±0.029 | 0.576±0.095      | 0.942±0.024 | 0.620±0.097       | 33987.3 ± 66238.1 |
|                       |                   |             |                      |                    |             |             | L2-logistic | 0.845±0.030 | 0.553±0.127      | 0.908±0.026 | 0.550±0.092       | all*              |
|                       |                   |             |                      |                    |             |             | Majority    | 0.824±0.031 | 0.000±0.000      | 1.000±0.000 | –                 | –                 |
| Naive Bayes           | 0.802±0.030       | 0.630±0.090 |                      |                    |             |             | 0.838±0.027 | 0.523±0.088 | all              |             |                   |                   |
| PolySVM               | 0.848±0.031       | 0.417±0.136 |                      |                    |             |             | 0.941±0.024 | 0.479±0.122 | all              |             |                   |                   |
| CART <sub>b</sub>     | 0.860±0.041       | 0.422±0.172 |                      |                    |             |             | 0.953±0.027 | 0.499±0.150 | 2.7 ± 0.9        |             |                   |                   |
| CART <sub>cv</sub>    | 0.861±0.037       | 0.482±0.150 |                      |                    |             |             | 0.944±0.034 | 0.539±0.116 | 6.8 ± 2.8        |             |                   |                   |
| SCM <sub>b</sub>      | 0.891±0.022       | 0.604±0.134 |                      |                    |             |             | 0.953±0.021 | 0.650±0.098 | 3.6 ± 0.5        |             |                   |                   |
| SCM <sub>cv</sub>     | 0.888±0.026       | 0.638±0.098 |                      |                    |             |             | 0.940±0.023 | 0.661±0.101 | 4.6 ± 1.3        |             |                   |                   |
| ciprofloxacin         | 132               | 22.5        |                      |                    |             |             | L1-logistic | 0.969±0.030 | 0.883±0.150      | 0.994±0.018 | 0.926±0.089       | 381.5 ± 452.3     |
|                       |                   |             |                      |                    |             |             | L2-logistic | 0.808±0.091 | 0.412±0.134      | 0.944±0.048 | 0.519±0.141       | all*              |
|                       |                   |             |                      |                    |             |             | Majority    | 0.742±0.115 | 0.000±0.000      | 1.000±0.000 | –                 | –                 |
|                       |                   |             |                      | Naive Bayes        | 0.708±0.100 | 0.385±0.178 | 0.810±0.092 | –           | all              |             |                   |                   |
|                       |                   |             |                      | PolySVM            | 0.788±0.125 | 0.287±0.237 | 0.985±0.033 | –           | all              |             |                   |                   |
|                       |                   |             |                      | CART <sub>b</sub>  | 0.965±0.038 | 0.917±0.133 | 0.982±0.029 | 0.934±0.086 | 1.0 ± 0.0        |             |                   |                   |
|                       |                   |             |                      | CART <sub>cv</sub> | 0.962±0.036 | 0.883±0.150 | 0.982±0.029 | 0.914±0.092 | 1.0 ± 0.0        |             |                   |                   |
|                       |                   |             |                      | SCM <sub>b</sub>   | 0.958±0.034 | 0.867±0.145 | 0.982±0.029 | 0.905±0.087 | 1.0 ± 0.0        |             |                   |                   |
|                       |                   |             |                      | SCM <sub>cv</sub>  | 0.958±0.034 | 0.867±0.145 | 0.982±0.029 | 0.905±0.087 | 1.0 ± 0.0        |             |                   |                   |
|                       |                   |             |                      | levofloxacin       | 491         | 43.0        | L1-logistic | 0.937±0.024 | 0.893±0.046      | 0.967±0.033 | 0.921±0.029       | 87.8 ± 9.6        |
|                       |                   |             |                      |                    |             |             | L2-logistic | 0.828±0.043 | 0.789±0.077      | 0.855±0.048 | 0.789±0.060       | all*              |
|                       |                   |             |                      |                    |             |             | Majority    | 0.588±0.027 | 0.000±0.000      | 1.000±0.000 | –                 | –                 |
| Naive Bayes           | 0.768±0.051       | 0.666±0.108 |                      |                    |             |             | 0.842±0.046 | 0.700±0.078 | all              |             |                   |                   |
| PolySVM               | 0.773±0.050       | 0.669±0.073 |                      |                    |             |             | 0.848±0.058 | 0.708±0.066 | all              |             |                   |                   |
| CART <sub>b</sub>     | 0.942±0.028       | 0.926±0.037 |                      |                    |             |             | 0.952±0.038 | 0.931±0.031 | 1.1 ± 0.3        |             |                   |                   |
| CART <sub>cv</sub>    | 0.941±0.021       | 0.963±0.026 | 0.924±0.037          |                    |             |             | 0.932±0.020 | 2.5 ± 1.1   |                  |             |                   |                   |
| SCM <sub>b</sub>      | 0.939±0.023       | 0.929±0.041 | 0.945±0.034          |                    |             |             | 0.927±0.025 | 1.2 ± 0.4   |                  |             |                   |                   |
| SCM <sub>cv</sub>     | 0.939±0.028       | 0.917±0.048 | 0.954±0.039          |                    |             |             | 0.926±0.033 | 1.4 ± 0.5   |                  |             |                   |                   |
| meropenem             | 380               | 39.0        | L1-logistic          |                    |             |             | 0.720±0.047 | 0.625±0.107 | 0.785±0.043      | 0.646±0.085 | 3827.0 ± 7601.6   |                   |
|                       |                   |             | L2-logistic          |                    |             |             | 0.688±0.035 | 0.586±0.079 | 0.761±0.046      | 0.608±0.060 | all*              |                   |
|                       |                   |             | Majority             |                    |             |             | 0.583±0.035 | 0.000±0.000 | 1.000±0.000      | –           | –                 |                   |
|                       |                   |             | Naive Bayes          | 0.663±0.036        | 0.546±0.057 | 0.746±0.057 | 0.573±0.059 | all         |                  |             |                   |                   |
|                       |                   |             | PolySVM              | 0.688±0.047        | 0.536±0.105 | 0.798±0.075 | 0.585±0.080 | all         |                  |             |                   |                   |
|                       |                   |             | CART <sub>b</sub>    | 0.724±0.040        | 0.650±0.099 | 0.778±0.069 | 0.659±0.055 | 1.1 ± 0.3   |                  |             |                   |                   |
|                       |                   |             | CART <sub>cv</sub>   | 0.711±0.038        | 0.647±0.106 | 0.757±0.072 | 0.647±0.067 | 2.6 ± 3.9   |                  |             |                   |                   |
|                       |                   |             | SCM <sub>b</sub>     | 0.722±0.038        | 0.650±0.099 | 0.776±0.067 | 0.658±0.055 | 1.2 ± 0.4   |                  |             |                   |                   |

Continued on next page

**Table S1. (Continued)**

| Species             | Antibiotic         | Genomes     | <i>k</i> -mers (millions) | Method             | Accuracy    | Sensitivity | Specificity | F1 score    | Complexity        |             |                |                     |
|---------------------|--------------------|-------------|---------------------------|--------------------|-------------|-------------|-------------|-------------|-------------------|-------------|----------------|---------------------|
| <i>P. difficile</i> | azithromycin       | 461         | 19.8                      | SCM <sub>cv</sub>  | 0.700±0.038 | 0.619±0.131 | 0.762±0.079 | 0.626±0.073 | 4.1 ± 6.0         |             |                |                     |
|                     |                    |             |                           | L1-logistic        | 0.947±0.020 | 0.934±0.037 | 0.958±0.026 | 0.941±0.023 | 52144.5 ± 97222.7 |             |                |                     |
|                     |                    |             |                           | L2-logistic        | 0.940±0.024 | 0.936±0.034 | 0.944±0.031 | 0.934±0.028 | all*              |             |                |                     |
|                     |                    |             |                           | Majority           | 0.543±0.027 | 0.000±0.000 | 1.000±0.000 | –           | –                 |             |                |                     |
|                     |                    |             |                           | Naive Bayes        | 0.864±0.036 | 0.768±0.051 | 0.946±0.031 | 0.838±0.041 | all               |             |                |                     |
|                     |                    |             |                           | PolySVM            | 0.951±0.023 | 0.943±0.038 | 0.959±0.026 | 0.946±0.028 | all               |             |                |                     |
|                     |                    |             |                           | CART <sub>b</sub>  | 0.985±0.009 | 0.981±0.010 | 0.988±0.014 | 0.983±0.011 | 3.0 ± 0.0         |             |                |                     |
|                     |                    |             |                           | CART <sub>cv</sub> | 0.976±0.017 | 0.965±0.029 | 0.986±0.013 | 0.974±0.019 | 3.9 ± 1.4         |             |                |                     |
|                     |                    |             |                           | SCM <sub>b</sub>   | 0.978±0.014 | 0.967±0.032 | 0.988±0.014 | 0.976±0.016 | 3.0 ± 0.7         |             |                |                     |
|                     |                    |             |                           | SCM <sub>cv</sub>  | 0.984±0.011 | 0.979±0.013 | 0.988±0.014 | 0.982±0.012 | 3.3 ± 0.5         |             |                |                     |
|                     |                    |             |                           | ceftriaxone        | 212         | 11.1        | L1-logistic | 0.902±0.038 | 0.936±0.046       | 0.809±0.161 | 0.934±0.026    | 101937.2 ± 234203.7 |
|                     |                    |             |                           |                    |             |             | L2-logistic | 0.907±0.029 | 0.933±0.041       | 0.844±0.145 | 0.936±0.020    | all*                |
|                     | Majority           | 0.743±0.055 | 1.000±0.000               |                    |             |             | 0.000±0.000 | 0.851±0.036 | –                 |             |                |                     |
|                     | Naive Bayes        | 0.824±0.036 | 0.792±0.046               |                    |             |             | 0.921±0.062 | 0.869±0.031 | all               |             |                |                     |
|                     | PolySVM            | 0.895±0.026 | 0.930±0.045               |                    |             |             | 0.798±0.137 | 0.929±0.019 | all               |             |                |                     |
|                     | CART <sub>b</sub>  | 0.886±0.029 | 0.914±0.057               |                    |             |             | 0.822±0.177 | 0.921±0.023 | 1.3 ± 0.5         |             |                |                     |
|                     | CART <sub>cv</sub> | 0.890±0.044 | 0.923±0.060               |                    |             |             | 0.810±0.177 | 0.925±0.032 | 2.0 ± 1.2         |             |                |                     |
|                     | SCM <sub>b</sub>   | 0.893±0.036 | 0.929±0.063               |                    |             |             | 0.793±0.164 | 0.927±0.028 | 1.2 ± 0.4         |             |                |                     |
|                     | SCM <sub>cv</sub>  | 0.890±0.038 | 0.921±0.056               |                    |             |             | 0.820±0.175 | 0.925±0.028 | 1.7 ± 0.8         |             |                |                     |
|                     | clarithromycin     | 461         | 19.8                      |                    |             |             | L1-logistic | 0.941±0.019 | 0.936±0.044       | 0.946±0.032 | 0.935±0.022    | 153841.5 ± 267155.4 |
|                     |                    |             |                           |                    |             |             | L2-logistic | 0.936±0.018 | 0.924±0.050       | 0.946±0.036 | 0.929±0.020    | all*                |
|                     |                    |             |                           |                    |             |             | Majority    | 0.543±0.027 | 0.000±0.000       | 1.000±0.000 | –              | –                   |
|                     |                    |             |                           | Naive Bayes        | 0.857±0.028 | 0.748±0.046 | 0.948±0.018 | 0.826±0.033 | all               |             |                |                     |
|                     |                    |             |                           | PolySVM            | 0.947±0.021 | 0.932±0.053 | 0.960±0.028 | 0.941±0.023 | all               |             |                |                     |
| CART <sub>b</sub>   |                    |             |                           | 0.972±0.022        | 0.970±0.048 | 0.974±0.010 | 0.969±0.025 | 2.9 ± 0.3   |                   |             |                |                     |
| CART <sub>cv</sub>  |                    |             |                           | 0.977±0.008        | 0.981±0.019 | 0.974±0.010 | 0.975±0.009 | 3.0 ± 0.0   |                   |             |                |                     |
| SCM <sub>b</sub>    |                    |             |                           | 0.972±0.022        | 0.970±0.048 | 0.974±0.010 | 0.969±0.025 | 2.9 ± 0.3   |                   |             |                |                     |
| SCM <sub>cv</sub>   |                    |             |                           | 0.977±0.008        | 0.981±0.019 | 0.974±0.010 | 0.975±0.009 | 3.0 ± 0.0   |                   |             |                |                     |
| clindamycin         |                    |             |                           | 265                | 17.8        | L1-logistic | 0.998±0.006 | 0.989±0.035 | 1.000±0.000       | 0.994±0.019 | 1153.1 ± 828.3 |                     |
|                     |                    |             |                           |                    |             | L2-logistic | 0.974±0.020 | 0.889±0.107 | 0.986±0.017       | 0.904±0.060 | all*           |                     |
|                     |                    |             |                           |                    |             | Majority    | 0.872±0.057 | 0.000±0.000 | 1.000±0.000       | –           | –              |                     |
|                     | Naive Bayes        | 0.734±0.043 | 1.000±0.000               |                    |             | 0.695±0.047 | 0.473±0.120 | all         |                   |             |                |                     |
|                     | PolySVM            | 0.964±0.017 | 0.877±0.124               |                    |             | 0.978±0.016 | 0.859±0.041 | all         |                   |             |                |                     |
|                     | CART <sub>b</sub>  | 0.972±0.020 | 0.931±0.112               |                    |             | 0.981±0.016 | 0.888±0.077 | 1.8 ± 0.4   |                   |             |                |                     |
|                     | CART <sub>cv</sub> | 0.975±0.022 | 0.931±0.112               |                    |             | 0.985±0.015 | 0.913±0.067 | 1.6 ± 0.5   |                   |             |                |                     |
|                     | SCM <sub>b</sub>   | 0.975±0.022 | 0.967±0.075               |                    |             | 0.978±0.014 | 0.904±0.083 | 2.0 ± 0.0   |                   |             |                |                     |
|                     | SCM <sub>cv</sub>  | 0.975±0.022 | 0.931±0.112               |                    |             | 0.985±0.015 | 0.913±0.067 | 1.6 ± 0.5   |                   |             |                |                     |
|                     | moxifloxacin       | 462         | 19.8                      |                    |             | L1-logistic | 0.957±0.027 | 0.921±0.040 | 0.980±0.038       | 0.944±0.033 | 121.8 ± 12.6   |                     |
|                     |                    |             |                           |                    |             | L2-logistic | 0.936±0.020 | 0.907±0.042 | 0.955±0.029       | 0.918±0.028 | all*           |                     |
|                     |                    |             |                           |                    |             | Majority    | 0.599±0.029 | 0.000±0.000 | 1.000±0.000       | –           | –              |                     |
| Naive Bayes         |                    |             |                           | 0.887±0.035        | 0.820±0.065 | 0.931±0.042 | 0.852±0.048 | all         |                   |             |                |                     |
| PolySVM             |                    |             |                           | 0.949±0.014        | 0.904±0.044 | 0.978±0.022 | 0.934±0.020 | all         |                   |             |                |                     |
| CART <sub>b</sub>   |                    |             |                           | 0.982±0.009        | 0.959±0.023 | 0.996±0.008 | 0.976±0.012 | 1.0 ± 0.0   |                   |             |                |                     |
| CART <sub>cv</sub>  |                    |             |                           | 0.982±0.009        | 0.959±0.023 | 0.996±0.008 | 0.976±0.012 | 1.1 ± 0.3   |                   |             |                |                     |
| SCM <sub>b</sub>    |                    |             |                           | 0.982±0.009        | 0.959±0.023 | 0.996±0.008 | 0.976±0.012 | 1.0 ± 0.0   |                   |             |                |                     |
| SCM <sub>cv</sub>   |                    |             |                           | 0.982±0.009        | 0.959±0.023 | 0.996±0.008 | 0.976±0.012 | 1.0 ± 0.0   |                   |             |                |                     |
| <i>S. aureus</i>    |                    |             |                           | ciprofloxacin      | 1229        | 12.3        | L1-logistic | 0.983±0.008 | 0.967±0.015       | 0.994±0.005 | 0.978±0.011    | 912.2 ± 1731.0      |
|                     |                    |             |                           |                    |             |             | L2-logistic | 0.975±0.011 | 0.962±0.022       | 0.984±0.011 | 0.969±0.014    | all*                |
|                     |                    |             |                           |                    |             |             | Majority    | 0.598±0.021 | 0.000±0.000       | 1.000±0.000 | –              | –                   |
|                     | Naive Bayes        | 0.892±0.009 | 0.812±0.020               |                    |             |             | 0.945±0.013 | 0.858±0.011 | all               |             |                |                     |
|                     | PolySVM            | 0.976±0.011 | 0.960±0.019               |                    |             |             | 0.986±0.009 | 0.969±0.013 | all               |             |                |                     |
|                     | CART <sub>b</sub>  | 0.983±0.007 | 0.965±0.014               |                    |             |             | 0.996±0.004 | 0.979±0.008 | 1.0 ± 0.0         |             |                |                     |
|                     | CART <sub>cv</sub> | 0.983±0.006 | 0.967±0.015               |                    |             |             | 0.994±0.006 | 0.978±0.008 | 1.3 ± 0.7         |             |                |                     |
|                     | SCM <sub>b</sub>   | 0.983±0.007 | 0.965±0.014               |                    |             |             | 0.996±0.004 | 0.979±0.008 | 1.0 ± 0.0         |             |                |                     |
|                     | SCM <sub>cv</sub>  | 0.983±0.006 | 0.965±0.014               |                    |             |             | 0.995±0.003 | 0.978±0.008 | 1.2 ± 0.4         |             |                |                     |
|                     | clindamycin        | 624         | 9.6                       |                    |             |             | L1-logistic | 0.969±0.013 | 0.978±0.017       | 0.955±0.034 | 0.972±0.012    | 710.4 ± 968.6       |
|                     |                    |             |                           |                    |             |             | L2-logistic | 0.957±0.013 | 0.962±0.029       | 0.949±0.025 | 0.962±0.014    | all*                |
|                     |                    |             |                           |                    |             |             | Majority    | 0.566±0.045 | 1.000±0.000       | 0.000±0.000 | 0.722±0.039    | –                   |
|                     |                    |             |                           | Naive Bayes        | 0.866±0.036 | 0.888±0.039 | 0.836±0.052 | 0.882±0.029 | all               |             |                |                     |
|                     |                    |             |                           | PolySVM            | 0.949±0.017 | 0.951±0.038 | 0.944±0.028 | 0.954±0.021 | all               |             |                |                     |
|                     |                    |             |                           | CART <sub>b</sub>  | 0.961±0.014 | 0.972±0.025 | 0.946±0.033 | 0.965±0.013 | 2.6 ± 1.3         |             |                |                     |
|                     |                    |             |                           | CART <sub>cv</sub> | 0.958±0.008 | 0.965±0.022 | 0.947±0.030 | 0.963±0.008 | 4.4 ± 2.2         |             |                |                     |
|                     |                    |             |                           | SCM <sub>b</sub>   | 0.961±0.016 | 0.971±0.020 | 0.947±0.035 | 0.966±0.014 | 2.0 ± 0.0         |             |                |                     |
|                     |                    |             |                           | SCM <sub>cv</sub>  | 0.961±0.016 | 0.971±0.020 | 0.947±0.035 | 0.966±0.014 | 2.2 ± 0.4         |             |                |                     |
|                     |                    |             |                           | erythromycin       | 1305        | 12.4        | L1-logistic | 0.976±0.009 | 0.978±0.012       | 0.976±0.016 | 0.970±0.012    | 10563.3 ± 27868.0   |
|                     |                    |             |                           |                    |             |             | L2-logistic | 0.976±0.006 | 0.977±0.008       | 0.976±0.009 | 0.970±0.007    | all*                |
|                     |                    |             |                           |                    |             |             | Majority    | 0.611±0.019 | 0.000±0.000       | 1.000±0.000 | –              | –                   |
|                     | Naive Bayes        | 0.764±0.027 | 0.772±0.060               |                    |             |             | 0.759±0.024 | 0.717±0.041 | all               |             |                |                     |
|                     | PolySVM            | 0.975±0.010 | 0.979±0.010               |                    |             |             | 0.973±0.016 | 0.968±0.013 | all               |             |                |                     |
|                     | CART <sub>b</sub>  | 0.976±0.009 | 0.975±0.009               |                    |             |             | 0.976±0.016 | 0.969±0.012 | 3.0 ± 0.0         |             |                |                     |
| CART <sub>cv</sub>  | 0.974±0.008        | 0.975±0.011 | 0.974±0.016               |                    |             |             | 0.967±0.011 | 3.6 ± 1.3   |                   |             |                |                     |
| SCM <sub>b</sub>    | 0.976±0.010        | 0.977±0.008 | 0.976±0.016               |                    |             |             | 0.970±0.012 | 3.0 ± 0.0   |                   |             |                |                     |
| SCM <sub>cv</sub>   | 0.973±0.012        | 0.975±0.006 | 0.972±0.020               |                    |             |             | 0.966±0.015 | 4.6 ± 2.1   |                   |             |                |                     |
| fusidic acid        | 986                | 11.9        | L1-logistic               |                    |             |             | 0.984±0.009 | 0.844±0.117 | 0.997±0.003       | 0.896±0.068 | 3120.5 ± 947.0 |                     |
|                     |                    |             | L2-logistic               |                    |             |             | 0.969±0.012 | 0.713±0.152 | 0.994±0.005       | 0.793±0.092 | all*           |                     |

Continued on next page

**Table S1. (Continued)**

| Species            | Antibiotic         | Genomes       | k-mers (millions) | Method             | Accuracy            | Sensitivity   | Specificity   | F1 score      | Complexity    |
|--------------------|--------------------|---------------|-------------------|--------------------|---------------------|---------------|---------------|---------------|---------------|
| S. enterica        | gentamicin         | 1306          | 12.4              | Majority           | 0.911 ± 0.019       | 0.000 ± 0.000 | 1.000 ± 0.000 | –             | –             |
|                    |                    |               |                   | Naive Bayes        | 0.675 ± 0.082       | 0.767 ± 0.122 | 0.664 ± 0.092 | 0.301 ± 0.065 | all           |
|                    |                    |               |                   | PolySVM            | 0.968 ± 0.015       | 0.686 ± 0.153 | 0.995 ± 0.006 | 0.780 ± 0.112 | all           |
|                    |                    |               |                   | CART <sub>b</sub>  | 0.976 ± 0.011       | 0.811 ± 0.135 | 0.991 ± 0.005 | 0.843 ± 0.089 | 2.5 ± 0.5     |
|                    |                    |               |                   | CART <sub>cv</sub> | 0.984 ± 0.010       | 0.917 ± 0.077 | 0.991 ± 0.005 | 0.907 ± 0.053 | 3.7 ± 0.9     |
|                    |                    |               |                   | SCM <sub>b</sub>   | 0.979 ± 0.011       | 0.855 ± 0.114 | 0.991 ± 0.005 | 0.871 ± 0.068 | 2.7 ± 0.5     |
|                    |                    |               |                   | SCM <sub>cv</sub>  | 0.983 ± 0.010       | 0.917 ± 0.077 | 0.990 ± 0.006 | 0.904 ± 0.054 | 3.2 ± 0.6     |
|                    |                    |               |                   | L1-logistic        | 0.997 ± 0.003       | 0.985 ± 0.018 | 0.999 ± 0.002 | 0.985 ± 0.013 | 136.0 ± 309.3 |
|                    |                    |               |                   | L2-logistic        | 0.993 ± 0.005       | 0.945 ± 0.053 | 0.999 ± 0.003 | 0.966 ± 0.031 | all*          |
|                    |                    |               |                   | Majority           | 0.874 ± 0.019       | 0.000 ± 0.000 | 1.000 ± 0.000 | –             | –             |
|                    |                    |               |                   | Naive Bayes        | 0.949 ± 0.038       | 0.906 ± 0.061 | 0.954 ± 0.042 | 0.826 ± 0.104 | all           |
|                    |                    |               |                   | PolySVM            | 0.989 ± 0.006       | 0.921 ± 0.056 | 0.998 ± 0.003 | 0.952 ± 0.032 | all           |
|                    | CART <sub>b</sub>  | 0.996 ± 0.003 | 0.975 ± 0.019     | 0.999 ± 0.002      | 0.983 ± 0.012       | 1.0 ± 0.0     |               |               |               |
|                    | CART <sub>cv</sub> | 0.996 ± 0.003 | 0.975 ± 0.019     | 0.999 ± 0.002      | 0.983 ± 0.012       | 1.0 ± 0.0     |               |               |               |
|                    | SCM <sub>b</sub>   | 0.996 ± 0.003 | 0.975 ± 0.019     | 0.999 ± 0.002      | 0.983 ± 0.012       | 1.0 ± 0.0     |               |               |               |
|                    | SCM <sub>cv</sub>  | 0.994 ± 0.004 | 0.967 ± 0.027     | 0.998 ± 0.002      | 0.977 ± 0.016       | 1.2 ± 0.4     |               |               |               |
|                    | L1-logistic        | 0.988 ± 0.005 | 0.985 ± 0.010     | 0.991 ± 0.007      | 0.987 ± 0.005       | 230.6 ± 212.3 |               |               |               |
|                    | L2-logistic        | 0.987 ± 0.003 | 0.984 ± 0.010     | 0.990 ± 0.007      | 0.986 ± 0.003       | all*          |               |               |               |
|                    | Majority           | 0.544 ± 0.016 | 0.000 ± 0.000     | 1.000 ± 0.000      | –                   | –             |               |               |               |
|                    | Naive Bayes        | 0.868 ± 0.019 | 0.875 ± 0.030     | 0.862 ± 0.020      | 0.858 ± 0.019       | all           |               |               |               |
|                    | PolySVM            | 0.987 ± 0.004 | 0.983 ± 0.010     | 0.991 ± 0.007      | 0.986 ± 0.005       | all           |               |               |               |
|                    | CART <sub>b</sub>  | 0.987 ± 0.005 | 0.984 ± 0.010     | 0.990 ± 0.007      | 0.986 ± 0.005       | 1.0 ± 0.0     |               |               |               |
|                    | CART <sub>cv</sub> | 0.987 ± 0.005 | 0.983 ± 0.011     | 0.990 ± 0.007      | 0.985 ± 0.006       | 1.6 ± 1.6     |               |               |               |
|                    | SCM <sub>b</sub>   | 0.987 ± 0.005 | 0.984 ± 0.010     | 0.990 ± 0.007      | 0.986 ± 0.005       | 1.0 ± 0.0     |               |               |               |
| SCM <sub>cv</sub>  | 0.987 ± 0.005      | 0.983 ± 0.010 | 0.990 ± 0.007     | 0.986 ± 0.005      | 1.9 ± 0.6           |               |               |               |               |
| L1-logistic        | 0.988 ± 0.025      | 0.980 ± 0.043 | 1.000 ± 0.000     | 0.989 ± 0.023      | 97.6 ± 47.0         |               |               |               |               |
| L2-logistic        | 0.988 ± 0.025      | 0.980 ± 0.043 | 1.000 ± 0.000     | 0.989 ± 0.023      | all*                |               |               |               |               |
| Majority           | 0.465 ± 0.131      | 0.100 ± 0.316 | 0.900 ± 0.316     | –                  | –                   |               |               |               |               |
| Naive Bayes        | 0.635 ± 0.072      | 0.777 ± 0.136 | 0.500 ± 0.153     | 0.658 ± 0.091      | all                 |               |               |               |               |
| PolySVM            | 0.988 ± 0.025      | 0.980 ± 0.043 | 1.000 ± 0.000     | 0.989 ± 0.023      | all                 |               |               |               |               |
| CART <sub>b</sub>  | 0.988 ± 0.025      | 0.980 ± 0.043 | 1.000 ± 0.000     | 0.989 ± 0.023      | 1.0 ± 0.0           |               |               |               |               |
| CART <sub>cv</sub> | 0.988 ± 0.025      | 0.980 ± 0.043 | 1.000 ± 0.000     | 0.989 ± 0.023      | 1.0 ± 0.0           |               |               |               |               |
| SCM <sub>b</sub>   | 0.988 ± 0.025      | 0.980 ± 0.043 | 1.000 ± 0.000     | 0.989 ± 0.023      | 1.0 ± 0.0           |               |               |               |               |
| SCM <sub>cv</sub>  | 0.988 ± 0.025      | 0.980 ± 0.043 | 1.000 ± 0.000     | 0.989 ± 0.023      | 1.0 ± 0.0           |               |               |               |               |
| L1-logistic        | 0.974 ± 0.013      | 0.981 ± 0.010 | 0.934 ± 0.051     | 0.985 ± 0.008      | 178881.5 ± 306100.4 |               |               |               |               |
| L2-logistic        | 0.976 ± 0.011      | 0.984 ± 0.009 | 0.931 ± 0.055     | 0.986 ± 0.007      | all*                |               |               |               |               |
| Majority           | 0.853 ± 0.022      | 1.000 ± 0.000 | 0.000 ± 0.000     | 0.921 ± 0.013      | –                   |               |               |               |               |
| Naive Bayes        | 0.518 ± 0.041      | 0.468 ± 0.045 | 0.817 ± 0.059     | 0.622 ± 0.039      | all                 |               |               |               |               |
| PolySVM            | 0.980 ± 0.011      | 0.990 ± 0.007 | 0.923 ± 0.047     | 0.988 ± 0.007      | all                 |               |               |               |               |
| CART <sub>b</sub>  | 0.973 ± 0.011      | 0.980 ± 0.007 | 0.934 ± 0.051     | 0.984 ± 0.007      | 1.7 ± 0.5           |               |               |               |               |
| CART <sub>cv</sub> | 0.971 ± 0.011      | 0.979 ± 0.010 | 0.930 ± 0.047     | 0.983 ± 0.007      | 2.5 ± 0.7           |               |               |               |               |
| SCM <sub>b</sub>   | 0.975 ± 0.012      | 0.983 ± 0.007 | 0.927 ± 0.057     | 0.985 ± 0.007      | 1.7 ± 0.5           |               |               |               |               |
| SCM <sub>cv</sub>  | 0.975 ± 0.012      | 0.985 ± 0.006 | 0.920 ± 0.056     | 0.985 ± 0.007      | 2.5 ± 1.0           |               |               |               |               |
| L1-logistic        | 0.986 ± 0.005      | 0.966 ± 0.029 | 0.991 ± 0.005     | 0.961 ± 0.015      | 78129.4 ± 175973.3  |               |               |               |               |
| L2-logistic        | 0.986 ± 0.006      | 0.957 ± 0.034 | 0.992 ± 0.006     | 0.960 ± 0.017      | all*                |               |               |               |               |
| Majority           | 0.820 ± 0.012      | 0.000 ± 0.000 | 1.000 ± 0.000     | –                  | –                   |               |               |               |               |
| Naive Bayes        | 0.919 ± 0.012      | 0.774 ± 0.075 | 0.951 ± 0.011     | 0.773 ± 0.044      | all                 |               |               |               |               |
| PolySVM            | 0.982 ± 0.007      | 0.942 ± 0.045 | 0.991 ± 0.005     | 0.949 ± 0.022      | all                 |               |               |               |               |
| CART <sub>b</sub>  | 0.986 ± 0.005      | 0.966 ± 0.022 | 0.991 ± 0.005     | 0.961 ± 0.015      | 2.0 ± 0.0           |               |               |               |               |
| CART <sub>cv</sub> | 0.986 ± 0.005      | 0.966 ± 0.022 | 0.991 ± 0.005     | 0.961 ± 0.015      | 2.0 ± 0.0           |               |               |               |               |
| SCM <sub>b</sub>   | 0.986 ± 0.005      | 0.966 ± 0.022 | 0.991 ± 0.005     | 0.961 ± 0.015      | 2.0 ± 0.0           |               |               |               |               |
| SCM <sub>cv</sub>  | 0.986 ± 0.005      | 0.966 ± 0.022 | 0.991 ± 0.005     | 0.961 ± 0.015      | 2.0 ± 0.0           |               |               |               |               |
| L1-logistic        | 0.947 ± 0.025      | 0.889 ± 0.052 | 0.987 ± 0.018     | 0.931 ± 0.035      | 43517.4 ± 92826.5   |               |               |               |               |
| L2-logistic        | 0.950 ± 0.022      | 0.901 ± 0.049 | 0.985 ± 0.021     | 0.935 ± 0.034      | all*                |               |               |               |               |
| Majority           | 0.578 ± 0.054      | 0.000 ± 0.000 | 1.000 ± 0.000     | –                  | –                   |               |               |               |               |
| Naive Bayes        | 0.928 ± 0.038      | 0.916 ± 0.038 | 0.936 ± 0.046     | 0.913 ± 0.049      | all                 |               |               |               |               |
| PolySVM            | 0.945 ± 0.025      | 0.889 ± 0.052 | 0.984 ± 0.022     | 0.930 ± 0.035      | all                 |               |               |               |               |
| CART <sub>b</sub>  | 0.959 ± 0.020      | 0.901 ± 0.050 | 1.000 ± 0.000     | 0.947 ± 0.027      | 1.0 ± 0.0           |               |               |               |               |
| CART <sub>cv</sub> | 0.959 ± 0.020      | 0.901 ± 0.050 | 1.000 ± 0.000     | 0.947 ± 0.027      | 1.0 ± 0.0           |               |               |               |               |
| SCM <sub>b</sub>   | 0.959 ± 0.020      | 0.901 ± 0.050 | 1.000 ± 0.000     | 0.947 ± 0.027      | 1.0 ± 0.0           |               |               |               |               |
| SCM <sub>cv</sub>  | 0.959 ± 0.020      | 0.901 ± 0.050 | 1.000 ± 0.000     | 0.947 ± 0.027      | 1.3 ± 0.9           |               |               |               |               |
| L1-logistic        | 0.875 ± 0.041      | 0.914 ± 0.042 | 0.741 ± 0.172     | 0.920 ± 0.028      | 836.0 ± 972.0       |               |               |               |               |
| L2-logistic        | 0.913 ± 0.026      | 0.940 ± 0.030 | 0.822 ± 0.098     | 0.944 ± 0.018      | all*                |               |               |               |               |
| Majority           | 0.791 ± 0.034      | 1.000 ± 0.000 | 0.000 ± 0.000     | 0.883 ± 0.022      | –                   |               |               |               |               |
| Naive Bayes        | 0.817 ± 0.038      | 0.969 ± 0.017 | 0.246 ± 0.113     | 0.893 ± 0.023      | all                 |               |               |               |               |
| PolySVM            | 0.909 ± 0.033      | 0.971 ± 0.020 | 0.685 ± 0.112     | 0.943 ± 0.021      | all                 |               |               |               |               |
| CART <sub>b</sub>  | 0.894 ± 0.041      | 0.919 ± 0.043 | 0.803 ± 0.165     | 0.932 ± 0.028      | 1.5 ± 0.8           |               |               |               |               |
| CART <sub>cv</sub> | 0.925 ± 0.039      | 0.945 ± 0.037 | 0.855 ± 0.087     | 0.951 ± 0.027      | 6.1 ± 3.1           |               |               |               |               |
| SCM <sub>b</sub>   | 0.881 ± 0.037      | 0.912 ± 0.037 | 0.769 ± 0.199     | 0.924 ± 0.025      | 1.4 ± 0.5           |               |               |               |               |
| SCM <sub>cv</sub>  | 0.920 ± 0.040      | 0.950 ± 0.040 | 0.808 ± 0.089     | 0.949 ± 0.027      | 5.5 ± 1.6           |               |               |               |               |
| L1-logistic        | 0.925 ± 0.039      | 0.953 ± 0.023 | 0.867 ± 0.107     | 0.946 ± 0.030      | 991.2 ± 1463.9      |               |               |               |               |
| L2-logistic        | 0.929 ± 0.033      | 0.959 ± 0.021 | 0.864 ± 0.102     | 0.950 ± 0.026      | all*                |               |               |               |               |
| Majority           | 0.709 ± 0.054      | 1.000 ± 0.000 | 0.000 ± 0.000     | 0.828 ± 0.037      | –                   |               |               |               |               |
| Naive Bayes        | 0.759 ± 0.053      | 0.992 ± 0.011 | 0.198 ± 0.092     | 0.853 ± 0.036      | all                 |               |               |               |               |

Continued on next page

**Table S1. (Continued)**

| Species                | Antibiotic         | Genomes     | k-mers<br>(millions) | Method             | Accuracy            | Sensitivity     | Specificity | F1 score    | Complexity   |
|------------------------|--------------------|-------------|----------------------|--------------------|---------------------|-----------------|-------------|-------------|--------------|
| <i>S. haemolyticus</i> | nalidixic acid     | 347         | 6.9                  | PolySVM            | 0.920±0.030         | 0.970±0.035     | 0.808±0.053 | 0.944±0.023 | all          |
|                        |                    |             |                      | CART <sub>b</sub>  | 0.913±0.024         | 0.943±0.035     | 0.848±0.067 | 0.938±0.020 | 1.0 ± 0.0    |
|                        |                    |             |                      | CART <sub>cv</sub> | 0.900±0.045         | 0.961±0.032     | 0.761±0.108 | 0.931±0.033 | 3.6 ± 1.3    |
|                        |                    |             |                      | SCM <sub>b</sub>   | 0.913±0.024         | 0.943±0.035     | 0.848±0.067 | 0.938±0.020 | 1.0 ± 0.0    |
|                        |                    |             |                      | SCM <sub>cv</sub>  | 0.907±0.025         | 0.941±0.035     | 0.834±0.089 | 0.934±0.020 | 1.6 ± 1.3    |
|                        |                    |             |                      | L1-logistic        | 0.978±0.014         | 0.849±0.129     | 0.994±0.008 | 0.876±0.078 | 181.0 ± 42.4 |
|                        |                    |             |                      | L2-logistic        | 0.943±0.029         | 0.622±0.233     | 0.981±0.019 | 0.659±0.175 | all*         |
|                        |                    |             |                      | Majority           | 0.906±0.031         | 0.000±0.000     | 1.000±0.000 | –           | –            |
|                        |                    |             |                      | Naive Bayes        | 0.893±0.034         | 0.049±0.087     | 0.981±0.018 | –           | all          |
|                        |                    |             |                      | PolySVM            | 0.938±0.034         | 0.456±0.269     | 0.991±0.011 | –           | all          |
|                        |                    |             |                      | CART <sub>b</sub>  | 0.978±0.014         | 0.849±0.129     | 0.994±0.008 | 0.876±0.078 | 1.0 ± 0.0    |
|                        |                    |             |                      | CART <sub>cv</sub> | 0.978±0.014         | 0.849±0.129     | 0.994±0.008 | 0.876±0.078 | 1.0 ± 0.0    |
|                        | SCM <sub>b</sub>   | 0.978±0.014 | 0.849±0.129          | 0.994±0.008        | 0.876±0.078         | 1.0 ± 0.0       |             |             |              |
|                        | SCM <sub>cv</sub>  | 0.978±0.014 | 0.849±0.129          | 0.994±0.008        | 0.876±0.078         | 1.0 ± 0.0       |             |             |              |
|                        | L1-logistic        | 0.890±0.028 | 0.959±0.028          | 0.629±0.086        | 0.932±0.018         | 4557.6 ± 3948.5 |             |             |              |
|                        | L2-logistic        | 0.886±0.023 | 0.959±0.021          | 0.618±0.110        | 0.930±0.015         | all*            |             |             |              |
|                        | Majority           | 0.791±0.034 | 1.000±0.000          | 0.000±0.000        | 0.883±0.022         | –               |             |             |              |
|                        | Naive Bayes        | 0.850±0.051 | 0.987±0.018          | 0.341±0.170        | 0.912±0.030         | all             |             |             |              |
|                        | PolySVM            | 0.893±0.028 | 0.983±0.020          | 0.555±0.101        | 0.935±0.018         | all             |             |             |              |
|                        | CART <sub>b</sub>  | 0.919±0.026 | 0.996±0.009          | 0.629±0.102        | 0.951±0.016         | 1.0 ± 0.0       |             |             |              |
|                        | CART <sub>cv</sub> | 0.917±0.023 | 0.994±0.010          | 0.629±0.102        | 0.950±0.014         | 1.4 ± 1.0       |             |             |              |
|                        | SCM <sub>b</sub>   | 0.919±0.026 | 0.996±0.009          | 0.629±0.102        | 0.951±0.016         | 1.0 ± 0.0       |             |             |              |
|                        | SCM <sub>cv</sub>  | 0.917±0.024 | 0.991±0.011          | 0.638±0.106        | 0.950±0.015         | 1.9 ± 1.6       |             |             |              |
|                        | L1-logistic        | 0.943±0.026 | 0.970±0.029          | 0.826±0.075        | 0.965±0.016         | 90.3 ± 21.2     |             |             |              |
| L2-logistic            | 0.929±0.032        | 0.959±0.038 | 0.791±0.062          | 0.956±0.021        | all*                |                 |             |             |              |
| Majority               | 0.822±0.033        | 1.000±0.000 | 0.000±0.000          | 0.902±0.020        | –                   |                 |             |             |              |
| Naive Bayes            | 0.842±0.032        | 0.975±0.027 | 0.224±0.073          | 0.910±0.020        | all                 |                 |             |             |              |
| PolySVM                | 0.925±0.044        | 0.982±0.029 | 0.665±0.156          | 0.955±0.026        | all                 |                 |             |             |              |
| CART <sub>b</sub>      | 0.943±0.026        | 0.970±0.029 | 0.828±0.069          | 0.965±0.016        | 1.1 ± 0.3           |                 |             |             |              |
| CART <sub>cv</sub>     | 0.946±0.030        | 0.975±0.030 | 0.818±0.076          | 0.967±0.019        | 3.3 ± 2.9           |                 |             |             |              |
| SCM <sub>b</sub>       | 0.946±0.027        | 0.970±0.029 | 0.839±0.067          | 0.967±0.017        | 1.1 ± 0.3           |                 |             |             |              |
| SCM <sub>cv</sub>      | 0.954±0.028        | 0.980±0.030 | 0.831±0.073          | 0.972±0.018        | 1.9 ± 0.6           |                 |             |             |              |
| L1-logistic            | 0.946±0.017        | 0.987±0.013 | 0.607±0.120          | 0.970±0.010        | 16480.8 ± 24362.6   |                 |             |             |              |
| L2-logistic            | 0.951±0.017        | 0.990±0.015 | 0.643±0.136          | 0.973±0.010        | all*                |                 |             |             |              |
| Majority               | 0.891±0.033        | 1.000±0.000 | 0.000±0.000          | 0.942±0.019        | –                   |                 |             |             |              |
| Naive Bayes            | 0.878±0.033        | 0.964±0.019 | 0.191±0.149          | 0.933±0.019        | all                 |                 |             |             |              |
| PolySVM                | 0.943±0.022        | 0.993±0.008 | 0.540±0.138          | 0.968±0.013        | all                 |                 |             |             |              |
| CART <sub>b</sub>      | 0.909±0.021        | 0.973±0.033 | 0.406±0.243          | 0.950±0.011        | 1.6 ± 0.5           |                 |             |             |              |
| CART <sub>cv</sub>     | 0.918±0.026        | 0.981±0.019 | 0.419±0.222          | 0.955±0.014        | 3.0 ± 1.4           |                 |             |             |              |
| SCM <sub>b</sub>       | 0.913±0.022        | 0.976±0.032 | 0.447±0.263          | 0.952±0.012        | 1.6 ± 0.7           |                 |             |             |              |
| SCM <sub>cv</sub>      | 0.931±0.021        | 0.984±0.016 | 0.492±0.236          | 0.962±0.011        | 2.4 ± 0.7           |                 |             |             |              |
| L1-logistic            | 0.888±0.036        | 0.923±0.042 | 0.769±0.148          | 0.929±0.025        | 1806.7 ± 1360.8     |                 |             |             |              |
| L2-logistic            | 0.914±0.032        | 0.949±0.022 | 0.789±0.095          | 0.946±0.021        | all*                |                 |             |             |              |
| Majority               | 0.793±0.034        | 1.000±0.000 | 0.000±0.000          | 0.884±0.022        | –                   |                 |             |             |              |
| Naive Bayes            | 0.790±0.042        | 0.980±0.026 | 0.064±0.064          | 0.880±0.027        | all                 |                 |             |             |              |
| PolySVM                | 0.935±0.016        | 0.971±0.015 | 0.799±0.086          | 0.959±0.010        | all                 |                 |             |             |              |
| CART <sub>b</sub>      | 0.910±0.028        | 0.921±0.019 | 0.877±0.093          | 0.942±0.020        | 2.2 ± 0.6           |                 |             |             |              |
| CART <sub>cv</sub>     | 0.909±0.037        | 0.945±0.032 | 0.778±0.110          | 0.942±0.025        | 6.6 ± 3.2           |                 |             |             |              |
| SCM <sub>b</sub>       | 0.912±0.036        | 0.923±0.029 | 0.877±0.100          | 0.943±0.025        | 2.0 ± 0.0           |                 |             |             |              |
| SCM <sub>cv</sub>      | 0.906±0.030        | 0.938±0.028 | 0.799±0.143          | 0.940±0.021        | 3.6 ± 1.4           |                 |             |             |              |
| L1-logistic            | 0.916±0.029        | 0.510±0.232 | 0.969±0.032          | 0.555±0.178        | 109872.9 ± 152324.6 |                 |             |             |              |
| L2-logistic            | 0.921±0.027        | 0.544±0.235 | 0.971±0.027          | 0.585±0.159        | all*                |                 |             |             |              |
| Majority               | 0.887±0.033        | 0.000±0.000 | 1.000±0.000          | –                  | –                   |                 |             |             |              |
| Naive Bayes            | 0.871±0.040        | 0.220±0.128 | 0.954±0.034          | –                  | all                 |                 |             |             |              |
| PolySVM                | 0.931±0.024        | 0.466±0.155 | 0.990±0.009          | 0.588±0.135        | all                 |                 |             |             |              |
| CART <sub>b</sub>      | 0.937±0.029        | 0.497±0.188 | 0.993±0.011          | 0.626±0.176        | 1.0 ± 0.0           |                 |             |             |              |
| CART <sub>cv</sub>     | 0.929±0.032        | 0.531±0.187 | 0.980±0.025          | 0.617±0.188        | 2.9 ± 2.1           |                 |             |             |              |
| SCM <sub>b</sub>       | 0.937±0.029        | 0.497±0.188 | 0.993±0.011          | 0.626±0.176        | 1.0 ± 0.0           |                 |             |             |              |
| SCM <sub>cv</sub>      | 0.929±0.032        | 0.531±0.187 | 0.980±0.025          | 0.617±0.188        | 1.7 ± 1.3           |                 |             |             |              |
| L1-logistic            | 0.925±0.047        | 0.955±0.052 | 0.883±0.102          | 0.938±0.042        | 279.1 ± 616.8       |                 |             |             |              |
| L2-logistic            | 0.838±0.057        | 0.894±0.080 | 0.778±0.167          | 0.867±0.060        | all*                |                 |             |             |              |
| Majority               | 0.629±0.126        | 1.000±0.000 | 0.000±0.000          | 0.765±0.103        | –                   |                 |             |             |              |
| Naive Bayes            | 0.758±0.136        | 0.678±0.216 | 0.892±0.103          | 0.756±0.172        | all                 |                 |             |             |              |
| PolySVM                | 0.829±0.077        | 0.856±0.059 | 0.794±0.196          | 0.859±0.067        | all                 |                 |             |             |              |
| CART <sub>b</sub>      | 0.925±0.047        | 0.955±0.052 | 0.883±0.102          | 0.938±0.042        | 1.0 ± 0.0           |                 |             |             |              |
| CART <sub>cv</sub>     | 0.933±0.053        | 0.961±0.054 | 0.892±0.109          | 0.944±0.046        | 1.0 ± 0.0           |                 |             |             |              |
| SCM <sub>b</sub>       | 0.925±0.047        | 0.955±0.052 | 0.883±0.102          | 0.938±0.042        | 1.0 ± 0.0           |                 |             |             |              |
| SCM <sub>cv</sub>      | 0.933±0.053        | 0.961±0.054 | 0.892±0.109          | 0.944±0.046        | 1.0 ± 0.0           |                 |             |             |              |
| L1-logistic            | 0.832±0.113        | 0.729±0.222 | 0.879±0.107          | 0.749±0.172        | 2732.4 ± 1611.9     |                 |             |             |              |
| L2-logistic            | 0.786±0.105        | 0.716±0.181 | 0.825±0.134          | 0.704±0.132        | all*                |                 |             |             |              |
| Majority               | 0.636±0.091        | 0.000±0.000 | 1.000±0.000          | –                  | –                   |                 |             |             |              |
| Naive Bayes            | 0.800±0.084        | 0.742±0.117 | 0.821±0.102          | 0.725±0.107        | all                 |                 |             |             |              |
| PolySVM                | 0.800±0.123        | 0.702±0.174 | 0.855±0.132          | 0.715±0.155        | all                 |                 |             |             |              |
| CART <sub>b</sub>      | 0.827±0.113        | 0.743±0.241 | 0.872±0.093          | 0.743±0.181        | 1.8 ± 0.4           |                 |             |             |              |
| CART <sub>cv</sub>     | 0.773±0.117        | 0.662±0.243 | 0.820±0.120          | 0.664±0.199        | 2.0 ± 0.7           |                 |             |             |              |

Continued on next page

**Table S1. (Continued)**

| Species              | Antibiotic         | Genomes       | k-mers (millions) | Method             | Accuracy        | Sensitivity     | Specificity   | F1 score      | Complexity      |
|----------------------|--------------------|---------------|-------------------|--------------------|-----------------|-----------------|---------------|---------------|-----------------|
| <i>S. pneumoniae</i> | tetracycline       | 100           | 5.1               | SCM <sub>b</sub>   | 0.827 ± 0.109   | 0.700 ± 0.256   | 0.893 ± 0.107 | 0.728 ± 0.182 | 1.7 ± 0.5       |
|                      |                    |               |                   | SCM <sub>cv</sub>  | 0.782 ± 0.137   | 0.654 ± 0.273   | 0.845 ± 0.096 | 0.664 ± 0.233 | 2.5 ± 1.4       |
|                      |                    |               |                   | L1-logistic        | 0.780 ± 0.067   | 0.669 ± 0.107   | 0.853 ± 0.082 | 0.698 ± 0.064 | 1550.3 ± 1271.7 |
|                      |                    |               |                   | L2-logistic        | 0.810 ± 0.061   | 0.744 ± 0.102   | 0.856 ± 0.074 | 0.745 ± 0.073 | all*            |
|                      |                    |               |                   | Majority           | 0.620 ± 0.082   | 0.000 ± 0.000   | 1.000 ± 0.000 | –             | –               |
|                      |                    |               |                   | Naive Bayes        | 0.780 ± 0.079   | 0.809 ± 0.155   | 0.769 ± 0.136 | 0.731 ± 0.101 | all             |
|                      |                    |               |                   | PolySVM            | 0.745 ± 0.093   | 0.574 ± 0.259   | 0.874 ± 0.091 | 0.600 ± 0.187 | all             |
|                      |                    |               |                   | CART <sub>b</sub>  | 0.785 ± 0.082   | 0.635 ± 0.163   | 0.892 ± 0.106 | 0.688 ± 0.112 | 1.0 ± 0.0       |
|                      |                    |               |                   | CART <sub>cv</sub> | 0.735 ± 0.088   | 0.686 ± 0.174   | 0.772 ± 0.156 | 0.658 ± 0.087 | 2.7 ± 1.9       |
|                      |                    |               |                   | SCM <sub>b</sub>   | 0.770 ± 0.116   | 0.603 ± 0.155   | 0.885 ± 0.159 | 0.667 ± 0.139 | 1.0 ± 0.0       |
|                      |                    |               |                   | SCM <sub>cv</sub>  | 0.730 ± 0.075   | 0.561 ± 0.128   | 0.838 ± 0.075 | 0.606 ± 0.084 | 2.2 ± 0.9       |
|                      |                    |               |                   | L1-logistic        | 0.977 ± 0.039   | 0.983 ± 0.038   | 0.966 ± 0.060 | 0.979 ± 0.038 | 777.9 ± 1049.9  |
|                      | L2-logistic        | 0.932 ± 0.069 | 0.934 ± 0.060     | 0.947 ± 0.088      | 0.938 ± 0.072   | all*            |               |               |                 |
|                      | Majority           | 0.618 ± 0.127 | 1.000 ± 0.000     | 1.000 ± 0.000      | 0.757 ± 0.104   | –               |               |               |                 |
|                      | Naive Bayes        | 0.877 ± 0.080 | 0.807 ± 0.164     | 0.978 ± 0.049      | 0.875 ± 0.112   | all             |               |               |                 |
|                      | PolySVM            | 0.900 ± 0.082 | 0.894 ± 0.102     | 0.931 ± 0.092      | 0.911 ± 0.079   | all             |               |               |                 |
|                      | CART <sub>b</sub>  | 0.945 ± 0.052 | 0.976 ± 0.050     | 0.903 ± 0.079      | 0.951 ± 0.050   | 1.0 ± 0.0       |               |               |                 |
|                      | CART <sub>cv</sub> | 0.941 ± 0.043 | 0.969 ± 0.052     | 0.897 ± 0.084      | 0.947 ± 0.046   | 1.0 ± 0.0       |               |               |                 |
|                      | SCM <sub>b</sub>   | 0.945 ± 0.052 | 0.976 ± 0.050     | 0.903 ± 0.079      | 0.951 ± 0.050   | 1.0 ± 0.0       |               |               |                 |
|                      | SCM <sub>cv</sub>  | 0.936 ± 0.038 | 0.956 ± 0.051     | 0.911 ± 0.089      | 0.944 ± 0.043   | 1.2 ± 0.4       |               |               |                 |
|                      | L1-logistic        | 0.948 ± 0.022 | 0.950 ± 0.023     | 0.947 ± 0.036      | 0.927 ± 0.031   | 1391.5 ± 1844.4 |               |               |                 |
|                      | L2-logistic        | 0.949 ± 0.020 | 0.936 ± 0.029     | 0.957 ± 0.028      | 0.928 ± 0.027   | all*            |               |               |                 |
|                      | Majority           | 0.654 ± 0.036 | 0.000 ± 0.000     | 1.000 ± 0.000      | –               | –               |               |               |                 |
|                      | Naive Bayes        | 0.910 ± 0.013 | 0.936 ± 0.034     | 0.896 ± 0.017      | 0.877 ± 0.020   | all             |               |               |                 |
|                      | PolySVM            | 0.946 ± 0.021 | 0.929 ± 0.039     | 0.955 ± 0.027      | 0.922 ± 0.030   | all             |               |               |                 |
|                      | CART <sub>b</sub>  | 0.960 ± 0.018 | 0.951 ± 0.035     | 0.966 ± 0.026      | 0.943 ± 0.026   | 1.0 ± 0.0       |               |               |                 |
|                      | CART <sub>cv</sub> | 0.959 ± 0.018 | 0.947 ± 0.035     | 0.966 ± 0.026      | 0.941 ± 0.026   | 1.0 ± 0.0       |               |               |                 |
|                      | SCM <sub>b</sub>   | 0.960 ± 0.018 | 0.951 ± 0.035     | 0.966 ± 0.026      | 0.943 ± 0.026   | 1.0 ± 0.0       |               |               |                 |
|                      | SCM <sub>cv</sub>  | 0.959 ± 0.018 | 0.947 ± 0.035     | 0.966 ± 0.026      | 0.941 ± 0.026   | 1.0 ± 0.0       |               |               |                 |
|                      | L1-logistic        | 0.986 ± 0.024 | 0.950 ± 0.127     | 0.996 ± 0.013      | 0.959 ± 0.082   | 211.2 ± 208.2   |               |               |                 |
|                      | L2-logistic        | 0.948 ± 0.034 | 0.833 ± 0.187     | 0.979 ± 0.022      | 0.842 ± 0.112   | all*            |               |               |                 |
|                      | Majority           | 0.810 ± 0.080 | 0.000 ± 0.000     | 1.000 ± 0.000      | –               | –               |               |               |                 |
|                      | Naive Bayes        | 0.907 ± 0.046 | 0.809 ± 0.233     | 0.932 ± 0.045      | 0.735 ± 0.192   | all             |               |               |                 |
|                      | PolySVM            | 0.938 ± 0.048 | 0.760 ± 0.292     | 0.979 ± 0.022      | –               | all             |               |               |                 |
|                      | CART <sub>b</sub>  | 0.990 ± 0.023 | 0.950 ± 0.127     | 1.000 ± 0.000      | 0.970 ± 0.079   | 1.0 ± 0.0       |               |               |                 |
|                      | CART <sub>cv</sub> | 0.990 ± 0.023 | 0.950 ± 0.127     | 1.000 ± 0.000      | 0.970 ± 0.079   | 1.0 ± 0.0       |               |               |                 |
| SCM <sub>b</sub>     | 0.990 ± 0.023      | 0.950 ± 0.127 | 1.000 ± 0.000     | 0.970 ± 0.079      | 1.0 ± 0.0       |                 |               |               |                 |
| SCM <sub>cv</sub>    | 0.990 ± 0.023      | 0.950 ± 0.127 | 1.000 ± 0.000     | 0.970 ± 0.079      | 1.0 ± 0.0       |                 |               |               |                 |
| L1-logistic          | 0.961 ± 0.028      | 0.970 ± 0.023 | 0.932 ± 0.086     | 0.974 ± 0.019      | 4386.0 ± 4378.0 |                 |               |               |                 |
| L2-logistic          | 0.948 ± 0.029      | 0.966 ± 0.033 | 0.897 ± 0.075     | 0.965 ± 0.020      | all*            |                 |               |               |                 |
| Majority             | 0.742 ± 0.047      | 1.000 ± 0.000 | 0.000 ± 0.000     | 0.851 ± 0.031      | –               |                 |               |               |                 |
| Naive Bayes          | 0.706 ± 0.034      | 0.716 ± 0.034 | 0.686 ± 0.133     | 0.783 ± 0.029      | all             |                 |               |               |                 |
| PolySVM              | 0.941 ± 0.030      | 0.964 ± 0.034 | 0.872 ± 0.077     | 0.960 ± 0.022      | all             |                 |               |               |                 |
| CART <sub>b</sub>    | 0.952 ± 0.026      | 0.951 ± 0.027 | 0.950 ± 0.078     | 0.966 ± 0.019      | 2.2 ± 0.4       |                 |               |               |                 |
| CART <sub>cv</sub>   | 0.948 ± 0.027      | 0.951 ± 0.031 | 0.937 ± 0.080     | 0.964 ± 0.019      | 3.1 ± 1.1       |                 |               |               |                 |
| SCM <sub>b</sub>     | 0.952 ± 0.026      | 0.951 ± 0.027 | 0.950 ± 0.078     | 0.966 ± 0.019      | 2.2 ± 0.4       |                 |               |               |                 |
| SCM <sub>cv</sub>    | 0.950 ± 0.030      | 0.959 ± 0.024 | 0.920 ± 0.096     | 0.966 ± 0.021      | 2.8 ± 0.8       |                 |               |               |                 |
| L1-logistic          | 0.864 ± 0.074      | 0.907 ± 0.172 | 0.851 ± 0.122     | 0.783 ± 0.140      | 411.8 ± 470.4   |                 |               |               |                 |
| L2-logistic          | 0.868 ± 0.079      | 0.812 ± 0.164 | 0.888 ± 0.075     | 0.762 ± 0.201      | all*            |                 |               |               |                 |
| Majority             | 0.705 ± 0.086      | 0.000 ± 0.000 | 1.000 ± 0.000     | –                  | –               |                 |               |               |                 |
| Naive Bayes          | 0.836 ± 0.089      | 0.818 ± 0.192 | 0.839 ± 0.071     | 0.721 ± 0.214      | all             |                 |               |               |                 |
| PolySVM              | 0.818 ± 0.068      | 0.676 ± 0.184 | 0.883 ± 0.077     | 0.666 ± 0.178      | all             |                 |               |               |                 |
| CART <sub>b</sub>    | 0.850 ± 0.077      | 0.914 ± 0.101 | 0.827 ± 0.111     | 0.769 ± 0.150      | 1.0 ± 0.0       |                 |               |               |                 |
| CART <sub>cv</sub>   | 0.827 ± 0.093      | 0.733 ± 0.240 | 0.850 ± 0.117     | 0.685 ± 0.220      | 2.4 ± 1.4       |                 |               |               |                 |
| SCM <sub>b</sub>     | 0.864 ± 0.091      | 0.876 ± 0.166 | 0.846 ± 0.121     | 0.771 ± 0.205      | 1.0 ± 0.0       |                 |               |               |                 |
| SCM <sub>cv</sub>    | 0.850 ± 0.088      | 0.860 ± 0.178 | 0.832 ± 0.108     | 0.750 ± 0.204      | 1.2 ± 0.4       |                 |               |               |                 |
| L1-logistic          | 0.994 ± 0.012      | 0.996 ± 0.014 | 0.992 ± 0.024     | 0.995 ± 0.010      | 233.3 ± 219.9   |                 |               |               |                 |
| L2-logistic          | 0.976 ± 0.033      | 0.988 ± 0.027 | 0.953 ± 0.062     | 0.983 ± 0.024      | all*            |                 |               |               |                 |
| Majority             | 0.694 ± 0.068      | 1.000 ± 0.000 | 0.000 ± 0.000     | 0.818 ± 0.048      | –               |                 |               |               |                 |
| Naive Bayes          | 0.835 ± 0.048      | 0.774 ± 0.066 | 0.970 ± 0.049     | 0.865 ± 0.045      | all             |                 |               |               |                 |
| PolySVM              | 0.941 ± 0.046      | 0.964 ± 0.044 | 0.889 ± 0.094     | 0.958 ± 0.031      | all             |                 |               |               |                 |
| CART <sub>b</sub>    | 0.982 ± 0.025      | 0.996 ± 0.014 | 0.949 ± 0.073     | 0.988 ± 0.018      | 1.0 ± 0.0       |                 |               |               |                 |
| CART <sub>cv</sub>   | 0.982 ± 0.025      | 0.996 ± 0.014 | 0.949 ± 0.073     | 0.988 ± 0.018      | 1.0 ± 0.0       |                 |               |               |                 |
| SCM <sub>b</sub>     | 0.982 ± 0.025      | 0.996 ± 0.014 | 0.949 ± 0.073     | 0.988 ± 0.018      | 1.0 ± 0.0       |                 |               |               |                 |
| SCM <sub>cv</sub>    | 0.979 ± 0.020      | 0.983 ± 0.021 | 0.969 ± 0.053     | 0.985 ± 0.014      | 1.0 ± 0.0       |                 |               |               |                 |
| L1-logistic          | 0.956 ± 0.020      | 0.976 ± 0.015 | 0.909 ± 0.042     | 0.969 ± 0.015      | 9330.3 ± 9714.3 |                 |               |               |                 |
| L2-logistic          | 0.956 ± 0.022      | 0.978 ± 0.012 | 0.902 ± 0.050     | 0.969 ± 0.016      | all*            |                 |               |               |                 |
| Majority             | 0.714 ± 0.050      | 1.000 ± 0.000 | 0.000 ± 0.000     | 0.832 ± 0.035      | –               |                 |               |               |                 |
| Naive Bayes          | 0.869 ± 0.057      | 0.887 ± 0.067 | 0.822 ± 0.057     | 0.904 ± 0.047      | all             |                 |               |               |                 |
| PolySVM              | 0.949 ± 0.018      | 0.980 ± 0.015 | 0.874 ± 0.047     | 0.964 ± 0.013      | all             |                 |               |               |                 |
| CART <sub>b</sub>    | 0.964 ± 0.019      | 0.985 ± 0.014 | 0.911 ± 0.042     | 0.975 ± 0.013      | 1.0 ± 0.0       |                 |               |               |                 |
| CART <sub>cv</sub>   | 0.965 ± 0.019      | 0.977 ± 0.020 | 0.937 ± 0.037     | 0.976 ± 0.014      | 2.6 ± 1.6       |                 |               |               |                 |
| SCM <sub>b</sub>     | 0.964 ± 0.019      | 0.985 ± 0.014 | 0.911 ± 0.042     | 0.975 ± 0.013      | 1.0 ± 0.0       |                 |               |               |                 |
| SCM <sub>cv</sub>    | 0.971 ± 0.016      | 0.983 ± 0.016 | 0.937 ± 0.037     | 0.979 ± 0.012      | 2.4 ± 0.8       |                 |               |               |                 |
| L1-logistic          | 0.928 ± 0.011      | 0.942 ± 0.014 | 0.880 ± 0.024     | 0.953 ± 0.008      | 7172.4 ± 6532.7 |                 |               |               |                 |

Continued on next page



**Table S1.** (Continued)

| Species | Antibiotic | Genomes | $k$ -mers<br>(millions) | Method             | Accuracy    | Sensitivity | Specificity | F1 score    | Complexity |
|---------|------------|---------|-------------------------|--------------------|-------------|-------------|-------------|-------------|------------|
|         |            |         |                         | L2-logic           | 0.926±0.010 | 0.943±0.019 | 0.867±0.030 | 0.952±0.008 | all*       |
|         |            |         |                         | Majority           | 0.778±0.015 | 1.000±0.000 | 0.000±0.000 | 0.875±0.009 | –          |
|         |            |         |                         | Naive Bayes        | 0.854±0.019 | 0.852±0.026 | 0.858±0.032 | 0.900±0.015 | all        |
|         |            |         |                         | PolySVM            | 0.935±0.006 | 0.969±0.008 | 0.815±0.041 | 0.958±0.004 | all        |
|         |            |         |                         | CART <sub>b</sub>  | 0.939±0.010 | 0.973±0.008 | 0.819±0.029 | 0.961±0.007 | 5.4 ± 1.0  |
|         |            |         |                         | CART <sub>cv</sub> | 0.938±0.010 | 0.971±0.009 | 0.822±0.030 | 0.960±0.007 | 8.6 ± 4.4  |
|         |            |         |                         | SCM <sub>b</sub>   | 0.938±0.011 | 0.981±0.013 | 0.789±0.017 | 0.961±0.007 | 3.1 ± 0.3  |
|         |            |         |                         | SCM <sub>cv</sub>  | 0.937±0.008 | 0.983±0.006 | 0.778±0.024 | 0.961±0.005 | 4.0 ± 2.8  |

## References

1. Littlestone, N. & Warmuth, M. Relating data compression and learnability. Tech. Rep., University of California Santa Cruz, Santa Cruz, CA (1986).
2. Floyd, S. & Warmuth, M. Sample compression, learnability, and the Vapnik-Chervonenkis dimension. *Mach. Learn.* **21**, 269–304 (1995).
3. Marchand, M. & Sokolova, M. Learning with decision lists of data-dependent features. *J. Mach. Learn. Res.* **6**, 427–451 (2005).
